# Supplementary material
Source: PubMed Central journal article supplement (PMC6963238)
Supplement: baADV2019000975-suppl1.pdf [file baADV2019000975-suppl1.pdf]

American Society of Hematology Guidelines for Management of Venous Thromboembolism: Prevention of Venous Thromboembolism in Surgical Hospitalized Patients

**Supplement 1: Panel and Systematic Review Team Membership**

**Table:** Panel Members

| <b>ASH Guideline Panel on Prevention of VTE in Surgical Hospitalized Patients</b> |                             |                                              |
|-----------------------------------------------------------------------------------|-----------------------------|----------------------------------------------|
| 1                                                                                 | David Anderson, MD          | Chair, hematologist                          |
| 2                                                                                 | Philipp Dahm, MD, MHSc      | Vice-chair, methodologist, surgeon (urology) |
| 3                                                                                 | Francesco Dentali, MD       | Internal medicine, thrombosis-hemostasis     |
| 4                                                                                 | Charles Francis, MD         | Hematologist                                 |
| 5                                                                                 | David Garcia, MD            | Hematologist                                 |
| 6                                                                                 | Susan Kahn, MD, MSc         | Internal medicine, thrombosis-hemostasis     |
| 7                                                                                 | Tracy Minichiello, MD *     | Internal medicine                            |
| 8                                                                                 | Maryam Rahman, MD           | Neurosurgeon                                 |
| 9                                                                                 | Anita Rajasekhar, MD, MS    | Hematologist                                 |
| 10                                                                                | Frederick B. Rogers, MD, MS | Surgeon (general trauma)                     |
| 11                                                                                | Maureen Smythe, Pharm.D     | Pharmacist                                   |
| 12                                                                                | Kari Tikkinen, MD, PhD      | Surgeon (urology), methodologist             |
| 13                                                                                | Adolph Yates, MD            | Surgeon (orthopedic)                         |
| 14                                                                                | Carole Bennet               | Patient representative                       |
| 15                                                                                | Joyce Kirkman *             | Patient representative                       |

\* Dr. Minichiello and Ms. Kirkman were initially appointed to the panel and participated in prioritization of guideline questions and health outcomes. They did not participate in reviewing evidence, forming recommendations, or writing the guidelines.

**Table:** McMaster GRADE Centre Researchers Contributing to Evidence Syntheses

| <b>McMaster GRADE Centre Researchers</b> |                                   |
|------------------------------------------|-----------------------------------|
| 1                                        | Tejan Baldeh, MPH                 |
| 2                                        | Sara Balduzzi, PhD                |
| 3                                        | Angela Barbara, PhD               |
| 4                                        | Housne Begum, PhD                 |
| 5                                        | Jan L. Brožek, MD, PhD            |
| 6                                        | Samantha Craigie, MSc             |
| 7                                        | Andrea Darzi, MD, MPH             |
| 8                                        | Farid Foroutan, H.BSc             |
| 9                                        | Itziar Etxeandia Ikobaltzeta, PhD |
| 10                                       | Herman Johal, MD, MPH             |
| 11                                       | Gian Paolo Morgano, MSc           |
| 12                                       | Ignacio Neumann, MD, MSc, PhD     |
| 13                                       | Robby Nieuwlat, MSc, PhD          |
| 14                                       | Rana Qadeer, MSc                  |
| 15                                       | Mansoor Radwi, MD, MSc            |
| 16                                       | Yasir Rehman, MD, MSc             |

American Society of Hematology Guidelines for Management of Venous Thromboembolism: Prevention of Venous Thromboembolism in Surgical Hospitalized Patients

|    |                                     |
|----|-------------------------------------|
| 17 | Nora Ibargoyen Roteta, PharmD       |
| 18 | Holger Schünemann, MD, MSc, PhD     |
| 19 | Matthew Ventresca, MSc              |
| 20 | Wojtek Wiercioch, MSc               |
| 21 | Juan Jose Yepes-Nuñez, MD, MSc, PhD |
