# Supplementary material
Source: PubMed Central journal article supplement (PMC6963238)
Supplement: baADV2019000975-suppl4.pdf [file baADV2019000975-suppl4.pdf]

## Supplement 4: Search Strategies

### Search Strategies for Systematic Reviews

#### Recommendations 1-5:

#### Mechanical with or without pharmacological prophylaxis in surgical hospitalized patients

| OVERVIEW                      |                                                                                                                                                        |
|-------------------------------|--------------------------------------------------------------------------------------------------------------------------------------------------------|
| Interface:                    | Ovid                                                                                                                                                   |
| Database:                     | Medline, and Medline In-Process & Other Non-Indexed Citations (1946-present)                                                                           |
| Study Types:                  | Systematic reviews                                                                                                                                     |
| Search Strategy: search terms |                                                                                                                                                        |
| VTE FILTER                    |                                                                                                                                                        |
| 1                             | exp Thromboembolism/ or exp Venous Thromboembolism/                                                                                                    |
| 2                             | exp Pulmonary Embolism/                                                                                                                                |
| 3                             | exp Venous Thrombosis/                                                                                                                                 |
| 4                             | Thrombophlebitis/                                                                                                                                      |
| 5                             | (DVT or VTE or PE).mp.                                                                                                                                 |
| 6                             | ((Pulmon\$ or vein or venous or lung) adj (Emboli\$ or thromb\$)).mp.                                                                                  |
| 7                             | (thrombus* or thrombotic* or thrombolic* or thromboemboli* or thrombos* or embol*).mp.                                                                 |
| 8                             | ((deep or thromb* or stasis) adj2 (vein* or venous)) or (blood flow stasis or blood clot)).mp.                                                         |
| 9                             | or/1-8                                                                                                                                                 |
| SR FILTER                     |                                                                                                                                                        |
| 10                            | meta-analysis/ (62978)                                                                                                                                 |
| 11                            | meta-analysis as topic/                                                                                                                                |
| 12                            | (meta analy* or metanaly* or metaanaly*).ti,ab.                                                                                                        |
| 13                            | (reference list* or bibliograph* or hand search* or manual search* or relevant journals).ab.                                                           |
| 14                            | ((systematic* or evidence*) adj2 (review* or overview*)).ti,ab.                                                                                        |
| 15                            | (search strategy or search criteria or systematic search or study selection or data extraction).ab.                                                    |
| 16                            | (search* adj4 literature).ab.                                                                                                                          |
| 17                            | (medline or pubmed or cochrane or embase or psychlit or psyclit or psychinfo or psycinfo or cinahl or science citation index or bids or cancerlit).ab. |
| 18                            | ((pool* or combined) adj2 (data or trials or studies or results)).ab.                                                                                  |
| 19                            | cochrane.jw.                                                                                                                                           |
| 20                            | or/10-19                                                                                                                                               |
| 21                            | animals/ not humans/                                                                                                                                   |
| 22                            | exp Animals, Laboratory/                                                                                                                               |
| 23                            | exp Animal Experimentation/                                                                                                                            |
| 24                            | exp Models, Animal/                                                                                                                                    |
| 25                            | exp Rodentia/                                                                                                                                          |
| 26                            | (rat or rats or mouse or mice).ti.                                                                                                                     |
| 27                            | or/21-26                                                                                                                                               |
| 28                            | 20 not 27                                                                                                                                              |
| Mechanical - FILTER           |                                                                                                                                                        |
| 29                            | exp Bandages/ or exp Compression Bandages/                                                                                                             |
| 30                            | exp Intermittent Pneumatic Compression Devices/                                                                                                        |
| 31                            | exp Mechanical Processes/                                                                                                                              |

## American Society of Hematology Guidelines for Management of Venous Thromboembolism: Prevention of Venous Thromboembolism in Surgical Hospitalized Patients

32 exp Stockings, Compression/  
33 (stocking or stockings or hose or hosiery or tights or bandage).mp.  
34 mechanical.mp.  
35 (((calf or elastic or graded or limb or leg or pneumatic or sequential or plantar or foot) adj1  
compression) or (device adj1 compression) or (foot adj1 pump\*)).mp.  
36 or/29-35

37 9 and 36 VTE and Mechanical  
38 28 and 37 VTE and Mechanical and SR

### Thromboprophylaxis Filter

39 Primary Prevention/  
40 Venous Thrombosis/pc [Prevention & Control]  
41 Venous Thromboembolism/pc [Prevention & Control]  
42 Pulmonary Embolism/pc [Prevention & Control]  
43 prevent\$.mp.  
44 thromboprophylax\$.mp.  
45 prophyla\$.mp.  
46 or/39-45  
47 38 and 46 VTE and Mechanical and SR and THROMBOP

## OVERVIEW

Interface: Ovid  
Database: Embase (1974-present)  
Study Types: Systematic reviews

### Search Strategy: search terms

#### VTE - FILTER

1 exp vein thrombosis/  
2 exp Venous Thromboembolism/  
3 exp 'lung embolism'/  
4 Thrombophlebitis/  
5 (PE or DVT or VTE).mp.  
6 ((Pulmon\$ or vein or venous or lung) adj (Emboli\$ or thromb\$)).mp.  
7 (thrombus\* or thrombotic\* or thrombolic\* or thromboemboli\* or thrombos\* or embol\*).mp.  
8 (((deep or thromb\* or stasis) adj2 (vein\* or venous)) or (blood flow stasis or blood clot)).mp.  
9 or/1-8

#### Mechanical - FILTER

10 exp bandage/  
11 exp intermittent pneumatic compression device/  
  
12 exp compression stocking/  
13 (((calf or elastic or graded or limb or leg or pneumatic or sequential or plantar or foot) adj1  
compression) or (device adj1 compression) or (foot adj1 pump\*)).mp.  
14 mechanical.mp.  
15 (stocking or stockings or hose or hosiery or tights or bandage).mp.

## American Society of Hematology Guidelines for Management of Venous Thromboembolism: Prevention of Venous Thromboembolism in Surgical Hospitalized Patients

16 or/10-15

### SR - FILTER

17 systematic review/

18 meta-analysis/

19 (meta analy\* or metanaly\* or metaanaly\*).ti,ab.

20 (reference list\* or bibliograph\* or hand search\* or manual search\* or relevant journals).ab.

21 ((systematic\* or evidence\*) adj2 (review\* or overview\*)).ti,ab.

22 (search strategy or search criteria or systematic search or study selection or data extraction).ab.

23 (search\* adj4 literature).ab.

24 (medline or pubmed or cochrane or embase or psychlit or psyclit or psychinfo or psycinfo or cinahl or science citation index or bids or cancerlit).ab.

25 ((pool\* or combined) adj2 (data or trials or studies or results)).ab.

26 cochrane.jw.

27 or/17-26

28 animals/ not humans/

29 nonhuman/

30 exp Animal Experiment/

31 exp Experimental Animal/

32 animal model/

33 exp Rodent/

34 (rat or rats or mouse or mice).ti.

35 28 or 29 or 30 or 31 or 32 or 33 or 34

36 27 not 35

### Tromboprophylaxis - FILTER

37 primary prevention/

38 prophylaxis/

39 prevention/

40 embolism prevention/

41 thrombosis prevention/

42 vein thrombosis/pc [Prevention & Control]

43 venous thrombosis/pc [Prevention & Control]

44 Venous Thromboembolism/pc [Prevention & Control]

45 deep vein thrombosis/pc [Prevention & Control]

46 'lung embolism'/pc [Prevention & Control]

47 prevent\$.mp.

48 thromboprophylax\$.mp.

49 prophyla\$.mp.

50 or/37-49

51 9 and 16 and 36 VTE and Mechanical and SR

## OVERVIEW

Interface: Cochrane Library

Database: Cochrane Database of Systematic Reviews

Study Types: Systematic reviews

Search Strategy: search terms

## American Society of Hematology Guidelines for Management of Venous Thromboembolism: Prevention of Venous Thromboembolism in Surgical Hospitalized Patients

### VTE FILTER

- #1 MeSH descriptor: [Venous Thrombosis] explode all trees
- #2 MeSH descriptor: [Thromboembolism] explode all trees
- #3 MeSH descriptor: [Venous Thromboembolism] explode all trees
- #4 MeSH descriptor: [Pulmonary Embolism] explode all trees
- #5 MeSH descriptor: [Thrombophlebitis] this term only
- #6 (DVT or VTE or PE)
- #7 ((Pulmon\* or vein or venous or lung) near (Emboli\* or thromb\*))
- #8 (Thrombus\* or thrombotic\* or thrombotic\* or thromboemboli\* or thrombos\* or embol\*)
- #9 (((deep or thromb\* or stasis) near/2 (vein\* or venous)) or (blood flow stasis or blood clot))
- #10 #1 or #2 or #3 or #4 or #5 or #6 or #7 or #8 or #9

### Thromboprophylaxis FILTER

- #11 MeSH descriptor: [Primary Prevention] this term only
- #12 MeSH descriptor: [Venous Thrombosis] explode all trees and with qualifier(s): [Prevention & control - PC]
- #13 MeSH descriptor: [Venous Thromboembolism] explode all trees and with qualifier(s): [Prevention & control - PC]
- #14 MeSH descriptor: [Pulmonary Embolism] explode all trees and with qualifier(s): [Prevention & control - PC]
- #15 prevent\*
- #16 thromboprophylax\*
- #17 prophyla\*
- #18 #11 or #12 or #13 or #14 or #15 or #16 or #17

### Mechanical FILTER

- #18 MeSH descriptor: [Bandages] explode all trees
- #19 MeSH descriptor: [Compression Bandages] explode all trees
- #20 MeSH descriptor: [Intermittent Pneumatic Compression Devices] explode all trees
- #21 MeSH descriptor: [Mechanical Processes] explode all trees
- #22 MeSH descriptor: [Stockings, Compression] explode all trees
- #24 (mechanical)
- #25 (stocking or stockings or hose or hosiery or tights or bandage)
- #26 (((calf or elastic or graded or limb or leg or pneumatic or sequential or plantar or foot) near/1 compression) or (device near/1 compression) or (foot near/1 pump\*))
- #27 #18 or #19 or #20 or #21 or #22 or #23 or #24 or #25 or #26
- #28 #10 and #26 Publication Year from 2006 to 2016 VTE AND MECHANICAL
- #29 #28 and #27 VTE AND MECHANICAL AND Thromboprophylaxis

**Recommendations 7-30:**

**Pharmacological prophylaxis in surgical hospitalized patients undergoing any surgical procedures**

| OVERVIEW                      |                                                                                                                                                                                                                                                                                                                                                                                                                                                                                                                                                                                                |
|-------------------------------|------------------------------------------------------------------------------------------------------------------------------------------------------------------------------------------------------------------------------------------------------------------------------------------------------------------------------------------------------------------------------------------------------------------------------------------------------------------------------------------------------------------------------------------------------------------------------------------------|
| Interface:                    | Ovid                                                                                                                                                                                                                                                                                                                                                                                                                                                                                                                                                                                           |
| Database:                     | Medline, and Medline In-Process & Other Non-Indexed Citations (1946-present)                                                                                                                                                                                                                                                                                                                                                                                                                                                                                                                   |
| Study Types:                  | Systematic reviews                                                                                                                                                                                                                                                                                                                                                                                                                                                                                                                                                                             |
| Search Strategy: search terms |                                                                                                                                                                                                                                                                                                                                                                                                                                                                                                                                                                                                |
| ANY PHARMACOLOGICAL FILTER    |                                                                                                                                                                                                                                                                                                                                                                                                                                                                                                                                                                                                |
| 1                             | exp anticoagulant agent/                                                                                                                                                                                                                                                                                                                                                                                                                                                                                                                                                                       |
| 2                             | Anticoagula\$.mp.                                                                                                                                                                                                                                                                                                                                                                                                                                                                                                                                                                              |
| 3                             | or/1-2                                                                                                                                                                                                                                                                                                                                                                                                                                                                                                                                                                                         |
| 4                             | Antithrombins.mp. or exp Antithrombins/                                                                                                                                                                                                                                                                                                                                                                                                                                                                                                                                                        |
| 5                             | thrombin inhibitor/ or thrombin inhibitor.mp                                                                                                                                                                                                                                                                                                                                                                                                                                                                                                                                                   |
| 6                             | Factor Xa Inhibitors.mp. or exp Factor Xa Inhibitors/                                                                                                                                                                                                                                                                                                                                                                                                                                                                                                                                          |
| 7                             | rivaroxaban/ or dabigatran etexilate/ or apixaban/ or edoxaban/ or betrixaban/ or ximelagatran/                                                                                                                                                                                                                                                                                                                                                                                                                                                                                                |
| 8                             | (rivaroxaban or Xarelto or apixaban or Eliquis or dabigatran etexilate or Edoxaban or Savaysa or Betrixaban or ximelagatran or pradaxa or lixiana or exanta or Darexaban or Otamixaban\$ or Razaxaban or Bivalirudin or Desirudin or Lepirudin or Melagatran or YM 150 or Iprivask or argatrovan or pradax or BIBR-953 or BIBR-953ZW or BAY 59-7939 or BMS-562247 or DU-176 or DU-176b).mp.                                                                                                                                                                                                    |
| 9                             | (TSOAC\$ or NOAC\$ or DOAC\$).ti,ab,kw.                                                                                                                                                                                                                                                                                                                                                                                                                                                                                                                                                        |
| 10                            | ((Target adj Specific adj Oral adj Anticoagulant\$) or (oral adj anticoagulant\$) or (novel adj anticoagulant\$) or (new adj anticoagulant\$) or (direc\$ adj anticoagulant\$)).mp.                                                                                                                                                                                                                                                                                                                                                                                                            |
| 11                            | ((new or novel or direct or direct-acting or target-specific or targeted or non-vitamin K) adj3 oral anticoagulant*).mp.                                                                                                                                                                                                                                                                                                                                                                                                                                                                       |
| 12                            | (factor Xa adj2 (antag* or inhibit*)).mp.                                                                                                                                                                                                                                                                                                                                                                                                                                                                                                                                                      |
| 13                            | or/4-12                                                                                                                                                                                                                                                                                                                                                                                                                                                                                                                                                                                        |
| 14                            | exp Heparin/ or heparin.mp.                                                                                                                                                                                                                                                                                                                                                                                                                                                                                                                                                                    |
| 15                            | exp Heparin, Low-Molecular-Weight/                                                                                                                                                                                                                                                                                                                                                                                                                                                                                                                                                             |
| 16                            | dalteparin/ or enoxaparin/ or nadroparin/ or heparinoids/                                                                                                                                                                                                                                                                                                                                                                                                                                                                                                                                      |
| 17                            | (LMWH or LMWHs or low molecular weight heparin or nadroparin or fraxiparin* or enoxaparin* or clexane or klexane or lovenox or dalteparin or fragmin or ardeparin* or normiflo or tinzaparin or logiparin or innohep or certoparin or sandoparin or reviparin or clivarin* or danaproid or danaparoid or organan or antixarin or bemiparin* or hibor or zibor or ivor or badyket or semuloparin or parnaparin or tedelparin or fluxum or lohepa or lowhepa or parvoparin or seleparin* or tedelgliparin or lomoparan or organan or sulodexide or zivor or embolex or xaparin or clivarine).mp. |
| 18                            | (FR-860 or FR 860 or FR860 or PK-10,169 or PK 10,169 or PK10,169 or PK-10169 or PK 10169 or PK10169 or EMT-967 or EMT 967 or EMT967 or EMT-966 or EMT 966 or EMT966 or CY 216 or CY-216 or CY216 or LMF CY-216 or LMF CY 216 or LMF CY216).mp.                                                                                                                                                                                                                                                                                                                                                 |
| 19                            | or/14-18                                                                                                                                                                                                                                                                                                                                                                                                                                                                                                                                                                                       |
| 20                            | exp Platelet Aggregation/                                                                                                                                                                                                                                                                                                                                                                                                                                                                                                                                                                      |
| 21                            | Aspirin/                                                                                                                                                                                                                                                                                                                                                                                                                                                                                                                                                                                       |
| 22                            | Aminosalicylic Acids/                                                                                                                                                                                                                                                                                                                                                                                                                                                                                                                                                                          |
| 23                            | Phosphodiesterase inhibitors/                                                                                                                                                                                                                                                                                                                                                                                                                                                                                                                                                                  |
| 24                            | Dipyridamole/                                                                                                                                                                                                                                                                                                                                                                                                                                                                                                                                                                                  |
| 25                            | Thienopyridines/                                                                                                                                                                                                                                                                                                                                                                                                                                                                                                                                                                               |
| 26                            | Ticlopidine/                                                                                                                                                                                                                                                                                                                                                                                                                                                                                                                                                                                   |
| 27                            | Prasugrel Hydrochloride/                                                                                                                                                                                                                                                                                                                                                                                                                                                                                                                                                                       |

American Society of Hematology Guidelines for Management of Venous Thromboembolism: Prevention of Venous Thromboembolism in Surgical Hospitalized Patients

28 (Platelet Aggregation or Aspirin or Aminosalicylic Acids or Triflusal or Cilostazol or dipyridamole or Clopidogrel or Prasugrel or Ticlopidine or Tirofiban or Abciximab or Eptifibatide).mp.  
29 or/20-28  
30 exp 4-Hydroxycoumarins/ or warfarin/ or acenocoumarol/ or dicumarol/ or Coumarins/ or coumarin anticoagulant/ or ethyl biscoumacetate/ or phenprocoumon/ or phenindione/  
31 vitamin K antagonist\$.mp.  
32 (4-Hydroxycoumarins or warfarin or acenocoumarol or nicoumalone or sinthrome or Sintrom or phenindione or dicoumarol or coumadin or phenprocoumon or phepromaron or ethyl-biscoumacetate or phenindione or Diphenadione or Tiocloamarol or Racumi or Marcoumar or Marcumar or Falithrom or Coumadin or Jantoven or vitamin K antagonist\$ or VKA or fluindione or difenacoum or coumatetralyl).mp.  
33 30 or 31 or 32  
34 (fondaparinux or Arixtra).mp.  
35 exp Heparin/  
36 (un?fract\* adj heparin).mp.  
37 UFH.mp.  
38 ((sodium or alpha) adj1 heparin).mp.  
39 (Hepalean or Calcilean or Calciparine or Liquaemin or Liquemin or Multiparin or Novoheparin or Eparina or Hep-lock or Heparinate or Heparinic acid or Panheprin or Hepalean or Heparin Leo or Heparin Lock).mp.  
40 or/35-39  
41 3 or 13 or 19 or 29 or 33 or 34 or 40

VTE FILTER

42 exp Thromboembolism/ or exp Venous Thromboembolism/  
43 exp Pulmonary Embolism/  
44 exp Venous Thrombosis/  
45 Thrombophlebitis/  
46 (DVT or VTE or PE).mp.  
47 ((Pulmon\$ or vein or venous or lung) adj (Emboli\$ or thromb\$)).mp.  
48 (thrombus\* or thrombotic\* or thrombolic\* or thromboemboli\* or thrombos\* or embol\*).mp.  
49 (((deep or thromb\* or stasis) adj2 (vein\* or venous)) or (blood flow stasis or blood clot)).mp.  
50 or/42-49

51 41 and 50 ANY PHARMACOLOGICAL AND VTE

SR FILTER

52 meta-analysis/ (  
53 meta-analysis as topic/  
54 (meta analy\* or metanaly\* or metaanaly\*).ti,ab.  
55 (reference list\* or bibliograph\* or hand search\* or manual search\* or relevant journals).ab.  
56 ((systematic\* or evidence\*) adj2 (review\* or overview\*)).ti,ab.  
57 (search strategy or search criteria or systematic search or study selection or data extraction).ab.  
58 (search\* adj4 literature).ab.  
59 (medline or pubmed or cochrane or embase or psychlit or psyclit or psychinfo or psycinfo or cinahl or science citation index or bids or cancerlit).ab.  
60 ((pool\* or combined) adj2 (data or trials or studies or results)).ab.  
61 cochrane.jw.  
62 or/52-61  
63 animals/ not humans/  
64 exp Animals, Laboratory/  
65 exp Animal Experimentation/  
66 exp Models, Animal/  
67 exp Rodentia/  
68 (rat or rats or mouse or mice).ti.

## American Society of Hematology Guidelines for Management of Venous Thromboembolism: Prevention of Venous Thromboembolism in Surgical Hospitalized Patients

- 69 or/63-68  
70 62 not 69  
  
71 51 and 70 ANY PHARMACOLOGICAL AND VTE AND SR

### Thromboprophylaxis FILTER

- 72 Primary Prevention/  
73 Venous Thrombosis/pc [Prevention & Control]  
74 Venous Thromboembolism/pc [Prevention & Control]  
75 Pulmonary Embolism/pc [Prevention & Control]  
76 prevent\$.mp.  
77 thromboprophylax\$.mp.  
78 prophyla\$.mp.  
79 or/72-78  
  
80 71 and 79

## OVERVIEW

Interface: Ovid  
Database: Embase (1974-present)  
Study Types: Systematic reviews

### Search Strategy: search terms

#### ANY PHARMACOLOGICAL FILTER

- 1 exp antithrombin/ or Antithrombins.mp.
- 2 thrombin inhibitor/ or thrombin inhibitor.mp.
- 3 Factor Xa Inhibitors.mp. or exp blood clotting factor 10a inhibitor/
- 4 rivaroxaban/ or dabigatran etexilate/ or apixaban/ or edoxaban/ or betrixaban/ or ximelagatran/ or Darexaban/ or Otamixaban/ or Razaxaban/ or Bivalirudin/ or Desirudin/ or Lepirudin/ or Melagatran/
- 5 (rivaroxaban or Xarelto or apixaban or Eliquis or dabigatran etexilate or Edoxaban or Savaysa or Betrixaban or ximelagatran or pradaxa or lixiana or exanta or Darexaban or Otamixaban\$ or Razaxaban or Bivalirudin or Desirudin or Lepirudin or Melagatran or YM 150 or Iprivask or argatrovan or pradax or BIBR-953 or BIBR-953ZW or BAY 59-7939 or BMS-562247 or DU-176 or DU-176b).mp.
- 6 (TSOAC\$ or NOAC\$ or DOAC\$).ti,ab,kw.
- 7 ((Target adj Specific adj Oral adj Anticoagulant\$) or (oral adj anticoagulant\$) or (novel adj anticoagulant\$) or (new adj anticoagulant\$) or (direct\$ adj anticoagulant\$)).mp.
- 8 ((new or novel or direct or direct-acting or target-specific or targeted or non-vitamin K) adj3 oral anticoagulant\*).mp.
- 9 (factor Xa adj2 (antag\* or inhibit\*)).mp.
- 10 or/1-9 (43130)
- 11 exp 4 hydroxycoumarin/ or exp 4 hydroxycoumarin derivative/
- 12 warfarin/
- 13 acenocoumarol/
- 14 coumarin/ or coumarin derivative/
- 15 phenindione/
- 16 dicoumarol derivative/ or dicoumarol/
- 17 phenprocoumon/
- 18 phepromaron/

American Society of Hematology Guidelines for Management of Venous Thromboembolism: Prevention of Venous Thromboembolism in Surgical Hospitalized Patients

19 ethyl biscoumacetate/  
20 fluindione/ or difenacoum/ or coumatetralyl/  
21 vitamin K antagonist.mp. or antivitamin K/  
22 (4 hydroxycoumarin or warfarin or acenocoumarol or nicoumalone or sinthrome or Sintrom or phenindione or dicoumarol or coumadin or phenprocoumon or phepromaron or ethyl-biscoumacetate or phenindione or Diphenadione or Tiocloamarol or Racumi or Marcoumar or Marcumar or Falithrom or Coumadin or Jantoven or vitamin K antagonist\$ or VKA or fluindione or difenacoum or coumatetralyl).mp.  
23 or/11-22  
24 exp anticoagulant agent/  
25 Anticoagula\$.mp.  
26 24 or 25  
27 exp Platelet Aggregation/  
28 Aspirin/  
29 Aminosalicylic Acids/  
30 triflusal/  
31 Phosphodiesterase inhibitors/  
32 Dipyridamole/  
33 cilostazol/  
34 Thienopyridines/  
35 clopidogrel/  
36 prasugrel/  
37 Ticlopidine/  
38 Abciximab/  
39 Eptifibatide/  
40 Tirofiban/  
41 (Platelet Aggregation or Aspirin or Aminosalicylic Acids or Triflusal or Cilostazol or dipyridamole or Clopidogrel or Prasugrel or Ticlopidine or Tirofiban or Abciximab or Eptifibatide).mp.  
42 27 or 28 or 29 or 30 or 31 or 32 or 33 or 34 or 35 or 36 or 37 or 38 or 39 or 40 or 41  
43 (fondaparinux or Arixtra).mp.  
44 exp Heparin/  
45 (un?fract\* adj heparin).mp.  
46 UFH.mp.  
47 ((sodium or alpha) adj1 heparin).mp.  
48 (Hepalean or Calcilean or Calciparine or Liquaemin or Liquemin or Multiparin or Novoheparin or Eparina or Hep-lock or Heparinate or Heparinic acid or Panheprin or Hepalean or Heparin Leo or Heparin Lock).mp.  
49 or/44-48  
50 exp heparin derivative/ or heparin\*.mp.  
51 nadroparin/  
52 enoxaparin/  
53 dalteparin/  
54 ardeparin/  
55 tinzaparin/  
56 certoparin/  
57 reviparin/  
58 danaparoid/  
59 (LMWH or LMWHs or low molecular weight heparin or nadroparin or fraxiparin\* or enoxaparin\* or clexane or klexane or lovenox or dalteparin or fragmin or ardeparin\* or normiflo or tinzaparin or logiparin or innohep or certoparin or sandoparin or reviparin or clivarin\* or danaproid or danaparoid or organan or antixarin or bemiparin\* or hibor or zibor or ivor or badyket or semuloparin or parnaparin or tedelparin or fluxum or lohepa or lowhepa or parvoparin or seleparin\* or tedelgliparin or lomoparan or organan or sulodexide or zivor or embolex or xaparin or clivarine).mp.



American Society of Hematology Guidelines for Management of Venous Thromboembolism: Prevention of Venous Thromboembolism in Surgical Hospitalized Patients

60 (FR-860 or FR 860 or FR860 or PK-10,169 or PK 10,169 or PK10,169 or PK-10169 or PK 10169 or PK10169 or EMT-967 or EMT 967 or EMT967 or EMT-966 or EMT 966 or EMT966 or CY 216 or CY-216 or CY216 or LMF CY-216 or LMF CY 216 or LMF CY216).mp.

61 or/50-60

62 10 or 23 or 26 or 42 or 43 or 49 or 61

VTE FILTER

63 exp vein thrombosis/

64 exp Venous Thromboembolism/

65 exp 'lung embolism'/

66 Thrombophlebitis/

67 (PE or DVT or VTE).mp.

68 ((Pulmon\$ or vein or venous or lung) adj (Emboli\$ or thromb\$)).mp.

69 (thrombus\* or thrombotic\* or thrombolic\* or thromboemboli\* or thrombos\* or embol\*).mp.

70 (((deep or thromb\* or stasis) adj2 (vein\* or venous)) or (blood flow stasis or blood clot)).mp.

71 or/63-70 (588368)

SR FILTER

72 systematic review/

73 meta-analysis/

74 (meta analy\* or metanaly\* or metaanaly\*).ti,ab.

75 (reference list\* or bibliograph\* or hand search\* or manual search\* or relevant journals).ab.

76 ((systematic\* or evidence\*) adj2 (review\* or overview\*)).ti,ab.

77 (search strategy or search criteria or systematic search or study selection or data extraction).ab.

78 (search\* adj4 literature).ab.

79 (medline or pubmed or cochrane or embase or psychlit or psyclit or psychinfo or psycinfo or cinahl or science citation index or bids or cancerlit).ab.

80 ((pool\* or combined) adj2 (data or trials or studies or results)).ab.

81 cochrane.jw.

82 or/72-81

83 animals/ not humans/

84 nonhuman/

85 exp Animal Experiment/

86 exp Experimental Animal/

87 animal model/

88 exp Rodent/

89 (rat or rats or mouse or mice).ti.

90 83 or 84 or 85 or 86 or 87 or 88 or 89

91 82 not 90

92 62 and 71 and 91 ANY PHARMACOLOGICAL AND VTE AND SR

Thromboprophylaxis FILTER

93 primary prevention/

94 prophylaxis/

95 prevention/

96 embolism prevention/

97 thrombosis prevention/

98 vein thrombosis/pc [Prevention & Control]

99 venous thrombosis/pc [Prevention & Control]

100 Venous Thromboembolism/pc [Prevention & Control]

101 deep vein thrombosis/pc [Prevention & Control]

102 'lung embolism'/pc [Prevention & Control]

American Society of Hematology Guidelines for Management of Venous Thromboembolism: Prevention of Venous Thromboembolism in Surgical Hospitalized Patients

|     |                                                                      |
|-----|----------------------------------------------------------------------|
| 103 | prevent\$.mp.                                                        |
| 104 | thromboprophylax\$.mp.                                               |
| 105 | prophyla\$.mp.                                                       |
| 106 | or/93-105                                                            |
| 107 | 92 and 106 ANY PHARMACOLOGICAL AND VTE AND SR AND Thromboprophylaxis |

**OVERVIEW**

|              |                                         |
|--------------|-----------------------------------------|
| Interface:   | Cochrane Library                        |
| Database:    | Cochrane Database of Systematic Reviews |
| Study Types: | Systematic reviews                      |

**Search Strategy: search terms**

ANY PHARMACOLOGICAL FILTER

|     |                                                                                                                                                                                                                                                                                                                                                                                         |
|-----|-----------------------------------------------------------------------------------------------------------------------------------------------------------------------------------------------------------------------------------------------------------------------------------------------------------------------------------------------------------------------------------------|
| #1  | MeSH descriptor: [Heparin] explode all trees                                                                                                                                                                                                                                                                                                                                            |
| #2  | (UFH or Unfractionated Heparin or Heparin, Unfractionated or Sodium Heparin or Heparin, Sodium or Heparin Sodium or alpha-Heparin or alpha Heparin or Hepalean or Calcilean or Calciparine or Liquaemin or Liquemin or Multiparin or Novoheparin or Eparina or Hep-lock or Heparinate or Heparinic acid or Panheprin or Hepalean or Heparin Leo or Heparin Lock):ti,ab,kw               |
| #3  | #1 or #2 5194                                                                                                                                                                                                                                                                                                                                                                           |
| #4  | MeSH descriptor: [Antithrombins] explode all trees                                                                                                                                                                                                                                                                                                                                      |
| #5  | MeSH descriptor: [Factor Xa Inhibitors] explode all trees                                                                                                                                                                                                                                                                                                                               |
| #6  | (rivaroxaban or Xarelto or apixaban or Eliquis or dabigatran etexilate or Edoxaban or Savaysa or Betrixaban or ximelagatran or pradaxa or lixiana or exanta or Darexaban or Otamixaban\$ or Razaxaban or Bivalirudin or Desirudin or Lepirudin or Melagatran or YM 150 or Iprivask or argatrovan or pradax or BIBR-953 or BIBR-953ZW or BAY 59-7939 or BMS-562247 or DU-176 or DU-176b) |
| #7  | ((Target adj Specific adj Oral adj Anticoagulant\$) or (oral adj anticoagulant\$) or (novel adj anticoagulant\$) or (new adj anticoagulant\$) or (direc\$ adj anticoagulant\$))                                                                                                                                                                                                         |
| #8  | ((new or novel or direct or direct-acting or target-specific or targeted or non-vitamin K) near/3 oral anticoagulant*)                                                                                                                                                                                                                                                                  |
| #9  | (factor Xa adj2 (antag* or inhibit*))                                                                                                                                                                                                                                                                                                                                                   |
| #10 | #4 or #5 or #6 or #7 or #8 or #9                                                                                                                                                                                                                                                                                                                                                        |
| #11 | MeSH descriptor: [Anticoagulants] explode all trees                                                                                                                                                                                                                                                                                                                                     |
| #12 | (Anticoagulant or anticoagulation):ti,ab,kw                                                                                                                                                                                                                                                                                                                                             |
| #13 | #11 or #12                                                                                                                                                                                                                                                                                                                                                                              |
| #14 | MeSH descriptor: [Platelet Aggregation] explode all trees                                                                                                                                                                                                                                                                                                                               |
| #15 | MeSH descriptor: [Aspirin] 10 tree(s) exploded                                                                                                                                                                                                                                                                                                                                          |
| #16 | MeSH descriptor: [Aminosalicylic Acids] explode all trees                                                                                                                                                                                                                                                                                                                               |
| #17 | MeSH descriptor: [Phosphodiesterase Inhibitors] this term only                                                                                                                                                                                                                                                                                                                          |
| #18 | MeSH descriptor: [Dipyridamole] explode all trees                                                                                                                                                                                                                                                                                                                                       |
| #19 | MeSH descriptor: [Thienopyridines] explode all trees                                                                                                                                                                                                                                                                                                                                    |
| #20 | MeSH descriptor: [Ticlopidine] 11 tree(s) exploded                                                                                                                                                                                                                                                                                                                                      |
| #21 | MeSH descriptor: [Prasugrel Hydrochloride] this term only                                                                                                                                                                                                                                                                                                                               |
| #22 | (Platelet Aggregation or Aspirin or Aminosalicylic Acids or Triflusal or Cilostazol or dipyridamole or Clopidogrel or Prasugrel or Ticlopidine or Tirofiban or Abciximab or Eptifibatide)                                                                                                                                                                                               |
| #23 | #14 or #15 or #16 or #17 or #18 or #19 or #20 or #21 or #22                                                                                                                                                                                                                                                                                                                             |
| #24 | fondaparinux or Arixtra                                                                                                                                                                                                                                                                                                                                                                 |
| #25 | MeSH descriptor: [Heparin] explode all trees                                                                                                                                                                                                                                                                                                                                            |
| #26 | MeSH descriptor: [Heparin, Low-Molecular-Weight] explode all trees                                                                                                                                                                                                                                                                                                                      |

American Society of Hematology Guidelines for Management of Venous Thromboembolism: Prevention of Venous Thromboembolism in Surgical Hospitalized Patients

|                           |                                                                                                                                                                                                                                                                                                                                                                                                                                                                                                                                                                                                        |
|---------------------------|--------------------------------------------------------------------------------------------------------------------------------------------------------------------------------------------------------------------------------------------------------------------------------------------------------------------------------------------------------------------------------------------------------------------------------------------------------------------------------------------------------------------------------------------------------------------------------------------------------|
| #27                       | MeSH descriptor: [Heparinoids] this term only                                                                                                                                                                                                                                                                                                                                                                                                                                                                                                                                                          |
| #28                       | MeSH descriptor: [Dalteparin] this term only                                                                                                                                                                                                                                                                                                                                                                                                                                                                                                                                                           |
| #29                       | MeSH descriptor: [Enoxaparin] this term only                                                                                                                                                                                                                                                                                                                                                                                                                                                                                                                                                           |
| #30                       | MeSH descriptor: [Nadroparin] this term only                                                                                                                                                                                                                                                                                                                                                                                                                                                                                                                                                           |
| #31                       | (LMWH or LMWHs or low molecular weight heparin or heparin* or nadroparin or fraxiparin* or enoxaparin* or clexane or klexane or lovenox or dalteparin or fragmin or ardeparin* or normiflo or tinzaparin or logiparin or innohep or certoparin or sandoparin or reviparin or clivarin* or danaproid or danaparoid or orgaran or antixarin or bemiparin* or hibor or zibor or ivor or badyket or semuloparin or parnaparin or tedelparin or fluxum or lohepa or lowhepa or parvoparin or seleparin* or tedelgliparin or lomoparan or orgaran or sulodexide or zivor or embolex or xaparin or clivarine) |
| #32                       | (FR-860 or FR 860 or FR860 or PK-10,169 or PK 10,169 or PK10,169 or PK-10169 or PK 10169 or PK10169 or EMT-967 or EMT 967 or EMT967 or EMT-966 or EMT 966 or EMT966 or CY 216 or CY-216 or CY216 or LMF CY-216 or LMF CY 216 or LMF CY216)                                                                                                                                                                                                                                                                                                                                                             |
| #33                       | #25 or #26 or #27 or #28 or #29 or #30 or #31 or #32                                                                                                                                                                                                                                                                                                                                                                                                                                                                                                                                                   |
| #34                       | MeSH descriptor: [Warfarin] explode all trees                                                                                                                                                                                                                                                                                                                                                                                                                                                                                                                                                          |
| #35                       | MeSH descriptor: [Acenocoumarol] explode all trees                                                                                                                                                                                                                                                                                                                                                                                                                                                                                                                                                     |
| #36                       | MeSH descriptor: [Phenindione] explode all trees                                                                                                                                                                                                                                                                                                                                                                                                                                                                                                                                                       |
| #37                       | MeSH descriptor: [Coumarins] explode all trees                                                                                                                                                                                                                                                                                                                                                                                                                                                                                                                                                         |
| #38                       | MeSH descriptor: [Dicumarol] explode all trees                                                                                                                                                                                                                                                                                                                                                                                                                                                                                                                                                         |
| #39                       | MeSH descriptor: [Phenprocoumon] explode all trees                                                                                                                                                                                                                                                                                                                                                                                                                                                                                                                                                     |
| #40                       | MeSH descriptor: [Ethyl Biscoumacetate] explode all trees                                                                                                                                                                                                                                                                                                                                                                                                                                                                                                                                              |
| #41                       | MeSH descriptor: [4-Hydroxycoumarins] explode all trees                                                                                                                                                                                                                                                                                                                                                                                                                                                                                                                                                |
| #42                       | MeSH descriptor: [Phenprocoumon] explode all trees                                                                                                                                                                                                                                                                                                                                                                                                                                                                                                                                                     |
| #43                       | (4 hydroxycoumarin or warfarin or acenocoumarol or nicoumalone or sinthrome or Sintrom or phenindione or dicoumarol or coumadin or phenprocoumon or phepromaron or ethyl-biscoumacetate or phenindione or Diphenadione or Tioclomarol or Racumi or Marcoumar or Marcumar or Falithrom or Coumadin or Jantoven or vitamin K antagonist\$ or VKA or fluindione or difenacoum or coumatetralyl)                                                                                                                                                                                                           |
| #44                       | #34 or #35 or #36 or #37 or #38 or #39 or #40 or #41 or #42 or #43                                                                                                                                                                                                                                                                                                                                                                                                                                                                                                                                     |
| #45                       | #3 or #10 or #13 or #23 or #24 or #33 or #44                                                                                                                                                                                                                                                                                                                                                                                                                                                                                                                                                           |
| VTE FILTER                |                                                                                                                                                                                                                                                                                                                                                                                                                                                                                                                                                                                                        |
| #46                       | MeSH descriptor: [Venous Thrombosis] explode all trees                                                                                                                                                                                                                                                                                                                                                                                                                                                                                                                                                 |
| #47                       | MeSH descriptor: [Thromboembolism] explode all trees                                                                                                                                                                                                                                                                                                                                                                                                                                                                                                                                                   |
| #48                       | MeSH descriptor: [Venous Thromboembolism] explode all trees                                                                                                                                                                                                                                                                                                                                                                                                                                                                                                                                            |
| #49                       | MeSH descriptor: [Pulmonary Embolism] explode all trees                                                                                                                                                                                                                                                                                                                                                                                                                                                                                                                                                |
| #50                       | MeSH descriptor: [Thrombophlebitis] this term only                                                                                                                                                                                                                                                                                                                                                                                                                                                                                                                                                     |
| #51                       | (DVT or VTE or PE)                                                                                                                                                                                                                                                                                                                                                                                                                                                                                                                                                                                     |
| #52                       | ((Pulmon* or vein or venous or lung) near (Emboli* or thromb*))                                                                                                                                                                                                                                                                                                                                                                                                                                                                                                                                        |
| #53                       | (Thrombus* or thrombotic* or thrombolic* or thromboemboli* or thrombos* or embol*)                                                                                                                                                                                                                                                                                                                                                                                                                                                                                                                     |
| #54                       | ((deep or thromb* or stasis) near/2 (vein* or venous)) or (blood flow stasis or blood clot)                                                                                                                                                                                                                                                                                                                                                                                                                                                                                                            |
| #55                       | #46 or #47 or #48 or #49 or #50 or #51 or #52 or #53 or #54                                                                                                                                                                                                                                                                                                                                                                                                                                                                                                                                            |
| #56                       | #45 and #55 Publication Year from 2006 to 2016 ANY PHARMACOLOGICAL AND VTE -                                                                                                                                                                                                                                                                                                                                                                                                                                                                                                                           |
| Thromboprophylaxis FILTER |                                                                                                                                                                                                                                                                                                                                                                                                                                                                                                                                                                                                        |
| #57                       | MeSH descriptor: [Primary Prevention] this term only                                                                                                                                                                                                                                                                                                                                                                                                                                                                                                                                                   |
| #58                       | MeSH descriptor: [Venous Thrombosis] explode all trees and with qualifier(s): [Prevention & control - PC]                                                                                                                                                                                                                                                                                                                                                                                                                                                                                              |
| #59                       | MeSH descriptor: [Venous Thromboembolism] explode all trees and with qualifier(s): [Prevention & control - PC]                                                                                                                                                                                                                                                                                                                                                                                                                                                                                         |
| #60                       | MeSH descriptor: [Pulmonary Embolism] explode all trees and with qualifier(s): [Prevention & control - PC]                                                                                                                                                                                                                                                                                                                                                                                                                                                                                             |
| #61                       | prevent*                                                                                                                                                                                                                                                                                                                                                                                                                                                                                                                                                                                               |

American Society of Hematology Guidelines for Management of Venous Thromboembolism: Prevention of Venous Thromboembolism in Surgical Hospitalized Patients

|     |                                                                     |
|-----|---------------------------------------------------------------------|
| #62 | thromboprophylax*                                                   |
| #63 | prophyla*                                                           |
| #64 | #57 or #58 or #59 or #60 or #61 or #62 or #63                       |
| #65 | #55 and #64      ANY PHARMACOLOGICAL AND VTE AND Thromboprophylaxis |

American Society of Hematology Guidelines for Management of Venous Thromboembolism: Prevention of Venous Thromboembolism in Surgical Hospitalized Patients

**Searches for individual studies (RCTs and or observational studies)**

**Recommendations 1-5:**

**Mechanical with or without pharmacological prophylaxis in surgical hospitalized patients**

**OVERVIEW**

Interface: Ovid  
Database: Medline, and Medline In-Process & Other Non-Indexed Citations (1946-present)  
Study Types: Randomized controlled trials

**Search Strategy: search terms**

1. exp vein thrombosis/
2. exp Venous Thromboembolism/
3. exp 'lung embolism'/
4. Thrombophlebitis/
5. (PE or DVT or VTE).mp.
6. ((Pulmon\$ or vein or venous or lung) adj (Emboli\$ or thromb\$)).mp.
7. (thrombus\* or thrombotic\* or thrombolic\* or thromboemboli\* or thrombos\* or embol\*).mp.
8. (((deep or thromb\* or stasis) adj2 (vein\* or venous)) or (blood flow stasis or blood clot)).mp.
9. or/1-8
  
10. exp bandage/
11. exp intermittent pneumatic compression device/
12. exp compression stocking/
13. (((calf or elastic or graded or limb or leg or pneumatic or sequential or plantar or foot) adj1 compression) or (device adj1 compression) or (foot adj1 pump\*)).mp.
14. mechanical.mp.
15. (stocking or stockings or hose or hosiery or tights or bandage).mp.
16. or/10-15
  
17. animals/ not humans/
18. nonhuman/
19. exp Animal Experiment/
20. exp Experimental Animal/
21. animal model/
22. exp Rodent/
23. (rat or rats or mouse or mice).ti.
24. 17 or 18 or 19 or 20 or 21 or 22 or 23
  
25. primary prevention/
26. prophylaxis/
27. prevention/
28. embolism prevention/
29. thrombosis prevention/
30. vein thrombosis/pc [Prevention & Control]
31. venous thrombosis/pc [Prevention & Control]
32. Venous Thromboembolism/pc [Prevention & Control]
33. deep vein thrombosis/pc [Prevention & Control]
34. 'lung embolism'/pc [Prevention & Control]
35. prevent\$.mp.

## American Society of Hematology Guidelines for Management of Venous Thromboembolism: Prevention of Venous Thromboembolism in Surgical Hospitalized Patients

36. thromboprophylax\$.mp.
37. prophyla\$.mp.
38. or/25-37
  
39. random\*.ti,ab.
40. trial.ti,ab.
41. factorial\*.ti,ab.
42. (crossover\* or cross over\*).ti,ab.
43. ((doubl\* or singl\*) adj blind\*).ti,ab.
44. (assign\* or allocat\* or volunteer\* or placebo\*).ti,ab.
45. placebo.ab.
46. crossover procedure/
47. single blind procedure/
48. randomized controlled trial/
49. double blind procedure/
50. or/39-49
  
51. 9 and 16 and 38 and 50
52. 51 not 24

### OVERVIEW

Interface: Ovid  
Database: Embase (1974-present)  
Study Types: Randomized controlled trials

### Search Strategy: search terms

1. exp Thromboembolism/ or exp Venous Thromboembolism/
2. exp Pulmonary Embolism/
3. exp Venous Thrombosis/
4. Thrombophlebitis/
5. (DVT or VTE or PE).mp.
6. ((Pulmon\$ or vein or venous or lung) adj (Embol\$ or thromb\$)).mp.
7. (thrombus\* or thrombotic\* or thrombolic\* or thromboemboli\* or thrombos\* or embol\*).mp.
8. (((deep or thromb\* or stasis) adj2 (vein\* or venous)) or (blood flow stasis or blood clot)).mp.
9. or/1-8
  
10. animals/ not humans/
11. exp Animals, Laboratory/
12. exp Animal Experimentation/
13. exp Models, Animal/
14. exp Rodentia/
15. (rat or rats or mouse or mice).ti.
16. or/10-15
  
17. exp Bandages/ or exp Compression Bandages/
18. exp Intermittent Pneumatic Compression Devices/
19. exp Mechanical Processes/
20. exp Stockings, Compression/
21. (stocking or stockings or hose or hosiery or tights or bandage).mp.
22. mechanical.mp.

## American Society of Hematology Guidelines for Management of Venous Thromboembolism: Prevention of Venous Thromboembolism in Surgical Hospitalized Patients

23. (((calf or elastic or graded or limb or leg or pneumatic or sequential or plantar or foot) adj1 compression) or (device adj1 compression) or (foot adj1 pump\*)).mp.  
24. or/17-23
25. 9 and 24
26. Primary Prevention/  
27. Venous Thrombosis/pc [Prevention & Control]  
28. Venous Thromboembolism/pc [Prevention & Control]  
29. Pulmonary Embolism/pc [Prevention & Control]  
30. prevent\$.mp.  
31. thromboprophylax\$.mp.  
32. prophyla\$.mp.  
33. or/26-32
34. randomized controlled trial.pt.  
35. controlled clinical trial.pt.  
36. Clinical Trials as topic.sh.  
37. trial.ti,ab.  
38. factorial\*.ti,ab.  
39. (crossover\* or cross over\*).ti,ab.  
40. ((doubl\* or singl\*) adj blind\*).ti,ab.  
41. (assign\* or allocat\* or volunteer\* or placebo\*).ti,ab.  
42. placebo.ab.  
43. random\*.ti,ab.  
44. or/34-43
45. 25 and 33 and 44

### OVERVIEW

Interface: Cochrane Library  
Databases: Cochrane Central Register of Controlled Trials (CENTRAL)  
Study Types: Randomized controlled trials

### Search Strategy: search terms

- #1 MeSH descriptor: [Venous Thrombosis] explode all trees  
#2 MeSH descriptor: [Thromboembolism] explode all trees  
#3 MeSH descriptor: [Venous Thromboembolism] explode all trees  
#4 MeSH descriptor: [Pulmonary Embolism] explode all trees  
#5 MeSH descriptor: [Thrombophlebitis] this term only  
#6 (DVT or VTE or PE)  
#7 ((Pulmon\* or vein or venous or lung) near (Emboli\* or thromb\*))  
#8 (Thrombus\* or thrombotic\* or thrombolic\* or thromboemboli\* or thrombos\* or embol\*)  
#9 (((deep or thromb\* or stasis) near/2 (vein\* or venous)) or (blood flow stasis or blood clot))  
#10 #1 or #2 or #3 or #4 or #5 or #6 or #7 or #8 or #9 –VTE
- #11 MeSH descriptor: [Bandages] explode all trees  
#12 MeSH descriptor: [Compression Bandages] explode all trees  
#13 MeSH descriptor: [Intermittent Pneumatic Compression Devices] explode all trees

American Society of Hematology Guidelines for Management of Venous Thromboembolism: Prevention of Venous Thromboembolism in Surgical Hospitalized Patients

- #14 MeSH descriptor: [Mechanical Processes] explode all trees
- #15 MeSH descriptor: [Stockings, Compression] explode all trees
- #16 (mechanical)
- #17 (stocking or stockings or hose or hosiery or tights or bandage)
- #18 (((calf or elastic or graded or limb or leg or pneumatic or sequential or plantar or foot) near/1 compression) or (device near/1 compression) or (foot near/1 pump\*))
- #19 #19 or #20 or #21 or #22 or #23 or #24 or #25 or #26
  
- #20 #10 and #19 Publication Year from 1946 to -



American Society of Hematology Guidelines for Management of Venous Thromboembolism: Prevention of Venous Thromboembolism in Surgical Hospitalized Patients

**Recommendation 6:**

**Inferior vena cava filters insertion in surgical hospitalized patients**

| <b>OVERVIEW</b>                      |                                                                                                    |
|--------------------------------------|----------------------------------------------------------------------------------------------------|
| Interface:                           | Ovid                                                                                               |
| Database:                            | Medline, and Medline In-Process & Other Non-Indexed Citations (1946-present)                       |
| Study Types:                         | Systematic reviews, Randomized controlled trials and observational                                 |
| <b>Search Strategy: search terms</b> |                                                                                                    |
| 1                                    | Primary Prevention/                                                                                |
| 2                                    | Venous Thrombosis/pc [Prevention & Control]                                                        |
| 3                                    | Venous Thromboembolism/pc [Prevention & Control]                                                   |
| 4                                    | Pulmonary Embolism/pc [Prevention & Control]                                                       |
| 5                                    | prevent\$.mp.                                                                                      |
| 6                                    | thromboprophylax\$.mp.                                                                             |
| 7                                    | prophyla\$.mp.                                                                                     |
| 8                                    | or/1-7                                                                                             |
| 9                                    | exp Thromboembolism/ or exp Venous Thromboembolism/                                                |
| 10                                   | exp Pulmonary Embolism/                                                                            |
| 11                                   | exp Venous Thrombosis/                                                                             |
| 12                                   | Thrombophlebitis/                                                                                  |
| 13                                   | (DVT or VTE or PE).mp.                                                                             |
| 14                                   | ((Pulmon\$ or vein or venous or lung) adj (Emboli\$ or thromb\$)).mp.                              |
| 15                                   | (thrombus* or thrombotic* or thrombolic* or thromboemboli* or thrombos* or embol*).mp.             |
| 16                                   | ((deep or thromb* or stasis) adj2 (vein* or venous)) or (blood flow stasis or blood clot)).mp.     |
| 17                                   | or/9-16                                                                                            |
| 18                                   | exp vena cava filter/                                                                              |
| 19                                   | ven* cava filter*.mp.                                                                              |
| 20                                   | (Celect or Greenfield or Gunther Tulip or Ninitol Bard G2 or OptEase or Trapease or Vena Tech).mp. |
| 21                                   | or/18-20                                                                                           |
| 22                                   | 8 and 17 and 21                                                                                    |

| <b>OVERVIEW</b>                      |                                                                    |
|--------------------------------------|--------------------------------------------------------------------|
| Interface:                           | Ovid                                                               |
| Database:                            | Embase                                                             |
| Study Types:                         | Systematic reviews, Randomized controlled trials and observational |
| <b>Search Strategy: search terms</b> |                                                                    |
| 1.                                   | primary prevention/                                                |
| 2.                                   | prophylaxis/                                                       |
| 3.                                   | prevention/                                                        |
| 4.                                   | embolism prevention/                                               |
| 5.                                   | thrombosis prevention/                                             |
| 6.                                   | vein thrombosis/pc [Prevention & Control]                          |

## American Society of Hematology Guidelines for Management of Venous Thromboembolism: Prevention of Venous Thromboembolism in Surgical Hospitalized Patients

7. venous thrombosis/pc [Prevention & Control]
8. Venous Thromboembolism/pc [Prevention & Control]
9. deep vein thrombosis/pc [Prevention & Control]
10. 'lung embolism'/pc [Prevention & Control]
11. prevent\$.mp.
12. thromboprophylax\$.mp.
13. prophyla\$.mp.
14. or/1-13
  
15. exp vein thrombosis/
16. exp Venous Thromboembolism/
17. exp 'lung embolism'/
18. Thrombophlebitis/
19. (PE or DVT or VTE).mp.
20. ((Pulmon\$ or vein or venous or lung) adj (Emboli\$ or thromb\$)).mp.
21. (thrombus\* or thrombotic\* or thrombolic\* or thromboemboli\* or thrombos\* or embol\*).mp.
22. (((deep or thromb\* or stasis) adj2 (vein\* or venous)) or (blood flow stasis or blood clot)).mp.
23. or/15-22
  
24. exp vena cava filter/
25. ven\* cava filter\*.mp.
26. (Celect or Greenfield or Gunther Tulip or Ninitol Bard G2 or OptEase or Trapease or Vena Tech).mp.
27. or/24-26
  
28. 14 and 23 and 27

### OVERVIEW

|              |                                                                    |
|--------------|--------------------------------------------------------------------|
| Interface:   | Cochrane Library                                                   |
| Databases:   | Cochrane Central Register of Controlled Trials (CENTRAL)           |
| Study Types: | Systematic reviews, Randomized controlled trials and observational |

### Search Strategy: search terms

- #1 MeSH descriptor: [Venous Thrombosis] explode all trees
- #2 MeSH descriptor: [Thromboembolism] explode all trees
- #3 MeSH descriptor: [Venous Thromboembolism] explode all trees
- #4 MeSH descriptor: [Pulmonary Embolism] explode all trees
- #5 MeSH descriptor: [Thrombophlebitis] this term only
- #6 (DVT or VTE or PE)
- #7 ((Pulmon\* or vein or venous or lung) near (Emboli\* or thromb\*))
- #8 (Thrombus\* or thrombotic\* or thrombolic\* or thromboemboli\* or thrombos\* or embol\*)
- #9 (((deep or thromb\* or stasis) near/2 (vein\* or venous)) or (blood flow stasis or blood clot))
- #10 #1 or #2 or #3 or #4 or #5 or #6 or #7 or #8 or #9
  
- #11 MeSH descriptor: [Primary Prevention] this term only
- #12 MeSH descriptor: [Venous Thrombosis] explode all trees and with qualifier(s): [prevention & control - PC]
- #13 MeSH descriptor: [Venous Thromboembolism] explode all trees and with qualifier(s): [prevention & control - PC]
- #14 MeSH descriptor: [Pulmonary Embolism] explode all trees and with qualifier(s): [prevention & control - PC]
- #15 prevent\*

American Society of Hematology Guidelines for Management of Venous Thromboembolism: Prevention of Venous Thromboembolism in Surgical Hospitalized Patients

- |     |                                                                                                    |
|-----|----------------------------------------------------------------------------------------------------|
| #16 | thromboprophylax*                                                                                  |
| #17 | prophyla*                                                                                          |
| #18 | #11 or #12 or #13 or #14 or #15 or #16 or #17                                                      |
| #19 | MeSH descriptor: [Vena Cava Filters] explode all trees                                             |
| #20 | ven* cava filter*                                                                                  |
| #21 | Celect or Greenfield or (Gunther Tulip) or (Nitinol Bard G2) or OptEase or Trapease or (Vena Tech) |
| #22 | #19 or #20 or #21                                                                                  |
| #23 | #10 and #18 and #22                                                                                |

**Recommendations 9-15:**

**Pharmacological prophylaxis in surgical hospitalized patients undergoing orthopedic surgery. (Total hip and knee arthroplasty and Hip fracture repair)**

**OVERVIEW**

Interface: Ovid  
Database: Medline  
Study Types: Randomized controlled trials

**Search Strategy: search terms**

1. exp Asymptomatic Diseases/
2. (asymptomatic or (asymptomatic adj2 (Vein adj thromb\*)) or (asymptomatic adj (pulmonary or lung) adj (embolism or emboli))).mp.
3. 1 or 2
  
4. primary prevention/
5. prophylaxis/
6. prevention/
7. embolism prevention/
8. thrombosis prevention/
9. vein thrombosis/pc [Prevention & Control]
10. venous thrombosis/pc [Prevention & Control]
11. Venous Thromboembolism/pc [Prevention & Control]
12. deep vein thrombosis/pc [Prevention & Control]
13. 'lung embolism'/pc [Prevention & Control]
14. prevent\$.mp.
15. thromboprophylax\$.mp.
16. prophyla\$.mp.
17. or/4-16
  
18. exp anticoagulant agent/
19. Anticoagula\$.mp.
20. or/18-19
  
21. Antithrombins.mp. or exp Antithrombins/
22. thrombin inhibitor/ or thrombin inhibitor.mp.
23. Factor Xa Inhibitors.mp. or exp Factor Xa Inhibitors/
24. rivaroxaban/ or dabigatran etexilate/ or apixaban/ or edoxaban/ or betrixaban/ or ximelagatran/
25. (rivaroxaban or Xarelto or apixaban or Eliquis or dabigatran etexilate or Edoxaban or Savaysa or Betrixaban or ximelagatran or pradaxa or lixiana or exanta or Darexaban or Otamixaban\$ or Razaxaban or Bivalirudin or Desirudin or Lepirudin or Melagatran or YM 150 or lprivask or argatrovan or pradax or BIBR-953 or BIBR-953ZW or BAY 59-7939 or BMS-562247 or DU-176 or DU-176b).mp.
26. (TSOAC\$ or NOAC\$ or DOAC\$).ti,ab,kw.
27. ((Target adj Specific adj Oral adj Anticoagulant\$) or (oral adj anticoagulant\$) or (novel adj anticoagulant\$) or (new adj anticoagulant\$) or (direct\$ adj anticoagulant\$)).mp.
28. ((new or novel or direct or direct-acting or target-specific or targeted or non-vitamin K) adj3 oral anticoagulant\*).mp.
29. (factor Xa adj2 (antag\* or inhibit\*)).mp.
30. or/21-29

American Society of Hematology Guidelines for Management of Venous Thromboembolism: Prevention of Venous Thromboembolism in Surgical Hospitalized Patients

31. exp Heparin/ or heparin.mp.
32. exp Heparin, Low-Molecular-Weight/
33. dalteparin/ or enoxaparin/ or nadroparin/ or heparinoids/
34. (LMWH or LMWHs or low molecular weight heparin or nadroparin or fraxiparin\* or enoxaparin\* or clexane or klexane or lovenox or dalteparin or fragmin or ardeparin\* or normiflo or tinzaparin or logiparin or innohep or certoparin or sandoparin or reviparin or clivarin\* or danaproid or danaparoid or organan or antixarin or bemiparin\* or hibor or zibor or ivor or badyket or semuloparin or parnaparin or tedelparin or fluxum or lohepa or lowhepa or parvoparin or seleparin\* or tedelgliparin or lomoparan or organan or sulodexide or zivor or embolex or xaparin or clivarine).mp.
35. (FR-860 or FR 860 or FR860 or PK-10,169 or PK 10,169 or PK10,169 or PK-10169 or PK 10169 or PK10169 or EMT-967 or EMT 967 or EMT967 or EMT-966 or EMT 966 or EMT966 or CY 216 or CY-216 or CY216 or LMF CY-216 or LMF CY 216 or LMF CY216).mp.
36. or/31-35
  
37. exp 4-Hydroxycoumarins/ or warfarin/ or acenocoumarol/ or dicumarol/ or Coumarins/ or coumarin anticoagulant/ or ethyl biscoumacetate/ or phenprocoumon/ or phenindione/
38. vitamin K antagonist\$.mp.
39. (4-Hydroxycoumarins or warfarin or acenocoumarol or nicoumalone or sinthrome or Sintrom or phenindione or dicumarol or coumadin or phenprocoumon or phepromaron or ethyl-biscoumacetate or phenindione or Diphenadione or Tioclomarol or Racumi or Marcoumar or Marcumar or Falithrom or Coumadin or Jantoven or vitamin K antagonist\$ or VKA or fluidione or difenacoum or coumatetralyl).mp.
40. 37 or 38 or 39
  
41. (fondaparinux or Arixtra).mp.
42. exp Heparin/
43. (un?fract\* adj heparin).mp.
44. UFH.mp.
45. ((sodium or alpha) adj1 heparin).mp.
46. (Hepalean or Calcilean or Calciparine or Liquaemin or Liquemin or Multiparin or Novoheparin or Eparina or Hep-lock or Heparinate or Heparinic acid or Panheprin or Hepalean or Heparin Leo or Heparin Lock).mp.
47. or/42-46
  
48. 20 or 30 or 36 or 40 or 41 or 47
  
49. exp Platelet Aggregation/
50. Aspirin/
51. Aminosalicylic Acids/
52. Phosphodiesterase inhibitors/
53. Dipyridamole/
54. Thienopyridines/
55. Ticlopidine/
56. Prasugrel Hydrochloride/
57. (Platelet Aggregation or Aspirin or Aminosalicylic Acids or Triflusal or Cilostazol or dipyridamole or Clopidogrel or Prasugrel or Ticlopidine or Tirofiban or Abciximab or Eptifibatide).mp.
58. or/49-57
  
59. exp Femoral Fractures/
60. exp Hip Injuries/
61. ((pelvic or pelvis or acetabul\* or hip? or femur? or femoral or pipkin or sub-capital or cervical or intertroc\* or subtroc\* or hoffa or plateau or knee or proximal tibia or tibia? or fibula? or ankle or foot or tarsal or calcane\* or talar or talus or tali or lower extremity) adj3 (cast or break or broke? or fracture?)).mp.
62. Tibial Fractures/

## American Society of Hematology Guidelines for Management of Venous Thromboembolism: Prevention of Venous Thromboembolism in Surgical Hospitalized Patients

63. ((leg or foot or toe or ankle) adj3 (break or broke\* or fracture\*)).mp. [mp=title, abstract, original title, name of substance word, subject heading word, keyword heading word, protocol supplementary concept word, rare disease supplementary concept word, unique identifier]

64. or/59-63

65. randomized controlled trial.pt.

66. controlled clinical trial.pt.

67. Clinical Trials as topic.sh.

68. trial.ti,ab.

69. factorial\*.ti,ab.

70. (crossover\* or cross over\*).ti,ab.

71. ((doubl\* or singl\*) adj blind\*).ti,ab.

72. (assign\* or allocat\* or volunteer\* or placebo\*).ti,ab.

73. placebo.ab.

74. random\*.ti,ab.

75. or/65-74

76. 48 or 58

77. exp Thromboembolism/ or exp Venous Thromboembolism/

78. exp Pulmonary Embolism/

79. exp Venous Thrombosis/

80. Thrombophlebitis/

81. (DVT or VTE or PE).mp.

82. ((Pulmon\$ or vein or venous or lung) adj (Emboli\$ or thromb\$)).mp.

83. (thrombus\* or thrombotic\* or thrombolic\* or thromboemboli\* or thrombos\* or embol\*).mp.

84. (((deep or thromb\* or stasis) adj2 (vein\* or venous)) or (blood flow stasis or blood clot)).mp.

85. or/77-84

86. 17 and 64 and 75 and 76 and 85

### OVERVIEW

Interface: Ovid

Database: Embase

Study Types: Randomized controlled trials

### Search Strategy: search terms

1. exp vein thrombosis/

2. exp Venous Thromboembolism/

3. exp 'lung embolism'/

4. Thrombophlebitis/

5. (PE or DVT or VTE).mp.

6. ((Pulmon\$ or vein or venous or lung) adj (Emboli\$ or thromb\$)).mp.

7. (thrombus\* or thrombotic\* or thrombolic\* or thromboemboli\* or thrombos\* or embol\*).mp.

8. (((deep or thromb\* or stasis) adj2 (vein\* or venous)) or (blood flow stasis or blood clot)).mp.

9. or/1-8

10. primary prevention/

11. prophylaxis/

American Society of Hematology Guidelines for Management of Venous Thromboembolism: Prevention of Venous Thromboembolism in Surgical Hospitalized Patients

12. prevention/
13. embolism prevention/
14. thrombosis prevention/
15. vein thrombosis/pc [Prevention & Control]
16. venous thrombosis/pc [Prevention & Control]
17. Venous Thromboembolism/pc [Prevention & Control]
18. deep vein thrombosis/pc [Prevention & Control]
19. 'lung embolism'/pc [Prevention & Control]
20. prevent\$.mp.
21. thromboprophylax\$.mp.
22. prophyla\$.mp.
23. or/10-22
  
24. exp antithrombin/ or Antithrombins.mp.
25. thrombin inhibitor/ or thrombin inhibitor.mp.
26. Factor Xa Inhibitors.mp. or exp blood clotting factor 10a inhibitor/
27. rivaroxaban/ or dabigatran etexilate/ or apixaban/ or edoxaban/ or betrixaban/ or ximelagatran/ or Darexaban/ or Otamixaban/ or Razaxaban/ or Bivalirudin/ or Desirudin/ or Lepirudin/ or Melagatran/
28. (rivaroxaban or Xarelto or apixaban or Eliquis or dabigatran etexilate or Edoxaban or Savaysa or Betrixaban or ximelagatran or pradaxa or lixiana or exanta or Darexaban or Otamixaban\$ or Razaxaban or Bivalirudin or Desirudin or Lepirudin or Melagatran or YM 150 or Iprivask or argatrovan or pradax or BIBR-953 or BIBR-953ZW or BAY 59-7939 or BMS-562247 or DU-176 or DU-176b).mp.
29. (TSOAC\$ or NOAC\$ or DOAC\$).ti,ab,kw.
30. ((Target adj Specific adj Oral adj Anticoagulant\$) or (oral adj anticoagulant\$) or (novel adj anticoagulant\$) or (new adj anticoagulant\$) or (direc\$ adj anticoagulant\$)).mp.
31. ((new or novel or direct or direct-acting or target-specific or targeted or non-vitamin K) adj3 oral anticoagulant\*).mp.
32. (factor Xa adj2 (antag\* or inhibit\*)).mp.
33. or/24-32
  
34. exp 4 hydroxycoumarin/ or exp 4 hydroxycoumarin derivative/
35. warfarin/
36. acenocoumarol/
37. coumarin/ or coumarin derivative/
38. phenindione/
39. dicoumarol derivative/ or dicoumarol/
40. phenprocoumon/
41. phepromaron/
42. ethyl biscoumacetate/
43. fludione/ or difenacoum/ or coumatetralyl/
44. vitamin K antagonist.mp. or antivitamin K/
45. (4 hydroxycoumarin or warfarin or acenocoumarol or nicoumalone or sinthrome or Sintrom or phenindione or dicoumarol or coumadin or phenprocoumon or phepromaron or ethyl-biscoumacetate or phenindione or Diphenadione or Tiocloamarol or Racumi or Marcoumar or Marcumar or Falithrom or Coumadin or Jantoven or vitamin K antagonist\$ or VKA or fludione or difenacoum or coumatetralyl).mp.
46. or/34-45
  
47. exp anticoagulant agent/
48. Anticoagula\$.mp.
49. 47 or 48
  
50. (fondaparinux or Arixtra).mp.
51. exp Heparin/

American Society of Hematology Guidelines for Management of Venous Thromboembolism: Prevention of Venous Thromboembolism in Surgical Hospitalized Patients

52. (un?fract\* adj heparin).mp.
53. UFH.mp.
54. ((sodium or alpha) adj1 heparin).mp.
55. (Hepalean or Calcilean or Calciparine or Liquaemin or Liquemin or Multiparin or Novoheparin or Eparina or Hep-lock or Heparinate or Heparinic acid or Panheprin or Hepalean or Heparin Leo or Heparin Lock).mp.
56. or/51-55
  
57. exp heparin derivative/ or heparin\*.mp.
58. nadroparin/
59. enoxaparin/
60. dalteparin/
61. ardeparin/
62. tinzaparin/
63. certoparin/
64. reviparin/
65. danaparoid/
66. (LMWH or LMWHs or low molecular weight heparin or nadroparin or fraxiparin\* or enoxaparin\* or clexane or klexane or lovenox or dalteparin or fragmin or ardeparin\* or normiflo or tinzaparin or logiparin or innohep or certoparin or sandoparin or reviparin or clivarin\* or danaproid or danaparoid or orgaran or antixarin or bemiparin\* or hibor or zibor or ivor or badyket or semuloparin or parnaparin or tedelparin or fluxum or lohepa or lowhepa or parvoparin or seleparin\* or tedelgliparin or lomoparan or orgaran or sulodexide or zivor or embolex or xaparin or clivarine).mp.
67. (FR-860 or FR 860 or FR860 or PK-10,169 or PK 10,169 or PK10,169 or PK-10169 or PK 10169 or PK10169 or EMT-967 or EMT 967 or EMT967 or EMT-966 or EMT 966 or EMT966 or CY 216 or CY-216 or CY216 or LMF CY-216 or LMF CY 216 or LMF CY216).mp.
68. or/57-67
  
69. 33 or 46 or 49 or 50 or 56 or 68
  
70. exp Platelet Aggregation/
71. Aspirin/
72. Aminosalicylic Acids/
73. triflusal/
74. Phosphodiesterase inhibitors/
75. Dipyridamole/
76. cilostazol/
77. Thienopyridines/
78. clopidogrel/
79. prasugrel/
80. Ticlopidine/
81. Abciximab/
82. Eptifibatide/
83. Tirofiban/
84. (Platelet Aggregation or Aspirin or Aminosalicylic Acids or Triflusal or Cilostazol or dipyridamole or Clopidogrel or Prasugrel or Ticlopidine or Tirofiban or Abciximab or Eptifibatide).mp.
85. 70 or 71 or 72 or 73 or 74 or 75 or 76 or 77 or 78 or 79 or 80 or 81 or 82 or 83 or 84
  
86. exp leg fracture/
87. exp hip fracture/
88. ((pelvic or pelvis or acetabul\* or hip? or femur? or femoral or pipkin or sub-capital or cervical or intertroc\* or subtroc\* or hoffa or plateau or knee or proximal tibia or tibia? or fibula? or ankle or foot or tarsal or calcane\* or talar or talus or tali or lower extremity) adj3 (cast or break or broke? or fracture?)).mp.



## American Society of Hematology Guidelines for Management of Venous Thromboembolism: Prevention of Venous Thromboembolism in Surgical Hospitalized Patients

89. ((leg or foot or toe or ankle) adj3 (break or broke\* or fracture\*)).mp. [mp=title, abstract, heading word, drug trade name, original title, device manufacturer, drug manufacturer, device trade name, keyword, floating subheading]

90. or/86-89

91. random\*.ti,ab.

92. trial.ti,ab.

93. factorial\*.ti,ab.

94. (crossover\* or cross over\*).ti,ab.

95. ((doubl\* or singl\*) adj blind\*).ti,ab.

96. (assign\* or allocat\* or volunteer\* or placebo\*).ti,ab.

97. placebo.ab.

98. crossover procedure/

99. single blind procedure/

100. randomized controlled trial/

101. double blind procedure/

102. or/91-101

103. 69 or 85

104. 9 and 23 and 90 and 102 and 103

### OVERVIEW

Interface: Cochrane Library

Databases: Cochrane Central Register of Controlled Trials (CENTRAL)

Study Types: Randomized controlled trials

### Search Strategy: search terms

- #1 MeSH descriptor: [Vein thrombosis] explode all trees
- #2 MeSH descriptor: [Venous Thrombosis] explode all trees
- #3 MeSH descriptor: [Thromboembolism] explode all trees
- #4 MeSH descriptor: [Venous Thromboembolism] explode all trees
- #5 MeSH descriptor: [Pulmonary Embolism] explode all trees
- #6 MeSH descriptor: [Thrombophlebitis] this term only
- #7 (DVT or VTE or PE)
- #8 ((Pulmon\* or vein or venous or lung) near (Emboli\* or thromb\*))
- #9 (Thrombus\* or thrombotic\* or thrombolic\* or thromboemboli\* or thrombos\* or embol\*)
- #10 (((deep or thromb\* or stasis) near/2 (vein\* or venous)) or (blood flow stasis or blood clot))
- #11 #2 or #3 or #4 or #5 or #6 or #7 or #8 or #9 or #10
  
- #12 MeSH descriptor: [Primary Prevention] this term only
- #13 MeSH descriptor: [Venous Thrombosis] explode all trees and with qualifier(s): [prevention & control - PC]
- #14 MeSH descriptor: [Venous Thromboembolism] explode all trees and with qualifier(s): [prevention & control - PC]
- #15 MeSH descriptor: [Pulmonary Embolism] explode all trees and with qualifier(s): [prevention & control - PC]
- #16 prevent\*
- #17 thromboprophylax\*
- #18 prophyla\*

American Society of Hematology Guidelines for Management of Venous Thromboembolism: Prevention of Venous Thromboembolism in Surgical Hospitalized Patients

- #19 #12 or #13 or #14 or #15 or #16 or #17 or #18
- #20 MeSH descriptor: [Heparin] explode all trees
- #21 (UFH or Unfractionated Heparin or Heparin, Unfractionated or Sodium Heparin or Heparin, Sodium or Heparin Sodium or alpha-Heparin or alpha Heparin or Hepalean or Calcilean or Calciparine or Liquaemin or Liquemin or Multiparin or Novoheparin or Eparina or Hep-lock or Heparinate or Heparinic acid or Panheprin or Hepalean or Heparin Leo or Heparin Lock):ti,ab,kw
- #22 #20 or #21
- #23 MeSH descriptor: [Antithrombins] explode all trees
- #24 MeSH descriptor: [Factor Xa Inhibitors] explode all trees
- #25 (rivaroxaban or Xarelto or apixaban or Eliquis or dabigatran etexilate or Edoxaban or Savaysa or Betrixaban or ximelagatran or pradaxa or lixiana or exanta or Darexaban or Otamixaban\$ or Razaxaban or Bivalirudin or Desirudin or Lepirudin or Melagatran or YM 150 or Iprivask or argatrovan or pradax or BIBR953 or BIBR-953ZW or BAY 597939 or BMS-562247 or DU-176 or DU-176b)
- #26 ((Target adj Specific adj Oral adj Anticoagulant\$) or (oral adj anticoagulant\$) or (novel adj anticoagulant\$) or (new adj anticoagulant\$) or (direct adj anticoagulant\$))
- #27 ((new or novel or direct or direct-acting or target-specific or targeted or non-vitamin K) near/3 oral anticoagulant\*)
- #28 (factor Xa adj2(antag\* or inhibit\*))
- #29 #23 or #24 or #25 or #26 or #27 or #28
- #30 MeSH descriptor: [Anticoagulants] explode all trees
- #31 (Anticoagulant or anticoagulation):ti,ab,kw
- #32 #30 or #31
- #33 MeSH descriptor: [Platelet Aggregation] explode all trees
- #34 MeSH descriptor: [Aspirin] explode all trees
- #35 MeSH descriptor: [Aminosalicylic Acids] explode all trees
- #36 MeSH descriptor: [Phosphodiesterase Inhibitors] this term only
- #37 MeSH descriptor: [Dipyridamole] explode all trees
- #38 MeSH descriptor: [Thienopyridines] explode all trees
- #39 MeSH descriptor: [Ticlopidine] 11 tree(s) exploded
- #40 MeSH descriptor: [Prasugrel Hydrochloride] this term only
- #41 (Platelet Aggregation or Aspirin or Aminosalicylic Acids or Triflusal or Cilostazol or dipyridamole or Clopidogrel or Prasugrel or Ticlopidine or Tirofiban or Abciximab or Eptifibatide)
- #42 #33 or #34 or #35 or #36 or #37 or #38 or #39 or #40 or #41
- #43 fondaparinux or Arixtra
- #44 MeSH descriptor: [Heparin] explode all trees
- #45 MeSH descriptor: [Heparin, Low-Molecular-Weight] explode all trees
- #46 MeSH descriptor: [Heparinoids] this term only
- #47 MeSH descriptor: [Dalteparin] this term only
- #48 MeSH descriptor: [Enoxaparin] this term only
- #49 MeSH descriptor: [Nadroparin] this term only
- #50 (LMWH or LMWHs or low molecular weight heparin or heparin\* or nadroparin or fraxiparin\* or enoxaparin\* or clexane or klexane or lovenox or dalteparin or fragmin or ardeparin\* or normiflo or tinzaparin or logiparin or innohep or certoparin or sandoparin or reviparin or clivarin\* or danaproid or danaparoid or orgaran or antixarin or bemiparin\* or hibor or zibor or ivor or badyket or semuloparin or parnaparin or tedelparin or fluxum or lohepa or lowhepa or parvoparin or seleparin\* or tedelgliparin or lomoparan or orgaran or sulodexide or zivor or embolex or xaparin or clivarine)

American Society of Hematology Guidelines for Management of Venous Thromboembolism: Prevention of Venous Thromboembolism in Surgical Hospitalized Patients

- #51 (FR-860 or FR 860 or FR860 or PK-10,169 or PK 10,169 or PK10,169 or PK-10169 or PK 10169 or PK10169 or EMT-967 or EMT 967 or EMT967 or EMT-966 or EMT 966 or EMT966 or CY 216 or CY-216 or CY216 or LMF CY-216 or LMF CY 216 or LMF CY216)
- #52 #44 or #45 or #46 or #47 or #48 or #49 or #50 or #51
- #53 MeSH descriptor: [Warfarin] explode all trees
- #54 MeSH descriptor: [Acenocoumarol] explode all trees
- #55 MeSH descriptor: [Phenindione] explode all trees
- #56 MeSH descriptor: [Coumarins] explode all trees
- #57 MeSH descriptor: [Dicumarol] explode all trees
- #58 MeSH descriptor: [Phenprocoumon] explode all trees
- #59 MeSH descriptor: [Ethyl Biscoumacetate] explode all trees
- #60 MeSH descriptor: [4-Hydroxycoumarins] explode all trees
- #61 MeSH descriptor: [Phenprocoumon] explode all trees
- #62 (4 hydroxycoumarin or warfarin or acenocoumarol or nicoumalone or sinthrome or Sintrom or phenindione or dicoumarol or coumadin or phenprocoumon or phepromaron or ethyl-biscoumacetate or phenindione or Diphenadione or Tioclomarol or Racumi or Marcoumar or Marcumar or Falithrom or Coumadin or Jantoven or vitamin K antagonist\$ or VKA or fluindione or difenacoum or coumatetralyl)
- #63 #53 or #54 or #55 or #56 or #57 or #58 or #59 or #60 or #61 or #62
- #64 #22 or #29 or #32 or #42 or #43 or #52 or #63
- #65 MeSH descriptor: [Femoral Fractures] explode all trees
- #66 MeSH descriptor: [Hip Injuries] explode all trees
- #67 ((pelvic or pelvis or acetabul\* or hip? or femur? or femoral or pipkin or sub-capital or cervical or intertroc\* or subtroc\* or hoffa or plateau or knee or proximal tibia or tibia? or fibula? or ankle or foot or tarsal or calcane\* or talar or talus or tali or lower extremity) near/3 (cast or break or broke? or fracture?)):ti,ab,kw (Word variations have been searched)
- #68 MeSH descriptor: [Tibial Fractures] explode all trees
- #69 ((leg or foot or toe or ankle) near/3 (break or broke\* or fracture\*)):ti,ab,kw (Word variations have been searched)
- #70 #65 or #66 or #67 or #68 or #69
- #71 #11 and #19 and #64 and #70

**Recommendation 16-30:**

**Pharmacological prophylaxis in surgical hospitalized patients undergoing other surgeries: Major general surgery, major neurosurgical procedures, urological procedures, cardiac or major vascular surgery, major trauma, major gynecological surgery.**

**OVERVIEW**

Interface: Ovid  
Database: Medline, and Medline In-Process & Other Non-Indexed Citations (1946-present)  
Study Types: Randomized controlled trials

**Search Strategy: search terms**

1. exp anticoagulant agent/
2. Anticoagula\$.mp.
3. or/1-2
  
4. (Antithrombins or antithrombotic\*).mp. or exp Antithrombins/
5. thrombin inhibitor/ or thrombin inhibitor.mp.
6. Factor Xa Inhibitors.mp. or exp Factor Xa Inhibitors/
7. rivaroxaban/ or dabigatran etexilate/ or apixaban/ or edoxaban/ or betrixaban/ or ximelagatran/
8. (rivaroxaban or Xarelto or apixaban or Eliquis or dabigatran etexilate or Edoxaban or Savaysa or Betrixaban or ximelagatran or pradaxa or lixiana or exanta or Darexaban or Otamixaban\$ or Razaxaban or Bivalirudin or Desirudin or Lepirudin or Melagatran or YM 150 or Iprivask or argatrovan or pradax or BIBR-953 or BIBR-953ZW or BAY 59-7939 or BMS-562247 or DU-176 or DU-176b).mp.
9. (TSOAC\$ or NOAC\$ or DOAC\$).ti,ab,kw.
10. ((Target adj Specific adj Oral adj Anticoagulant\$) or (oral adj anticoagulant\$) or (novel adj anticoagulant\$) or (new adj anticoagulant\$) or (direct\$ adj anticoagulant\$)).mp.
11. ((new or novel or direct or direct-acting or target-specific or targeted or non-vitamin K) adj3 oral anticoagulant\*).mp.
12. (factor Xa adj2 (antag\* or inhibit\*)).mp.
13. or/4-12
  
14. exp Heparin/ or heparin.mp.
15. exp Heparin, Low-Molecular-Weight/
16. dalteparin/ or enoxaparin/ or nadroparin/ or heparinoids/
17. (LMWH or LMWHs or low molecular weight heparin or nadroparin or fraxiparin\* or enoxaparin\* or clexane or klexane or lovenox or dalteparin or fragmin or ardeparin\* or normiflo or tinzaparin or logiparin or innohep or certoparin or sandoparin or reviparin or clivarin\* or danaproid or danaparoid or orgaran or antixarin or bemiparin\* or hibor or zibor or ivor or badyket or semuloparin or parnaparin or tedelparin or fluxum or lohepa or lowhepa or parvoparin or seleparin\* or tedelgliparin or lomoparan or orgaran or sulodexide or zivor or embolex or xaparin or clivarine).mp.
18. (FR-860 or FR 860 or FR860 or PK-10,169 or PK 10,169 or PK10,169 or PK-10169 or PK 10169 or PK10169 or EMT-967 or EMT 967 or EMT967 or EMT-966 or EMT 966 or EMT966 or CY 216 or CY-216 or CY216 or LMF CY-216 or LMF CY 216 or LMF CY216).mp.
19. or/14-18
  
20. exp Platelet Aggregation/
21. Aspirin/
22. Aminosalicylic Acids/
23. Phosphodiesterase inhibitors/
24. Dipyridamole/
25. Thienopyridines/

American Society of Hematology Guidelines for Management of Venous Thromboembolism: Prevention of Venous Thromboembolism in Surgical Hospitalized Patients

26. Ticlopidine/
27. Prasugrel Hydrochloride/
28. (Platelet Aggregation or Aspirin or Aminosalicylic Acids or Triflusal or Cilostazol or dipyridamole or Clopidogrel or Prasugrel or Ticlopidine or Tirofiban or Abciximab or Eptifibatide).mp.
29. or/20-28
  
30. exp 4-Hydroxycoumarins/ or warfarin/ or acenocoumarol/ or dicoumarol/ or Coumarins/ or coumarin anticoagulant/ or ethyl biscoumacetate/ or phenprocoumon/ or phenindione/
31. vitamin K antagonist\$.mp.
32. (4-Hydroxycoumarins or warfarin or acenocoumarol or nicoumalone or sinthrome or Sintrom or phenindione or dicoumarol or coumadin or phenprocoumon or phepromaron or ethyl-biscoumacetate or phenindione or Diphenadione or Tioclomarol or Racumi or Marcoumar or Marcumar or Falithrom or Coumadin or Jantoven or vitamin K antagonist\$ or VKA or fluindione or difenacoum or coumatetralyl).mp.
33. 30 or 31 or 32
  
34. (fondaparinux or Arixtra).mp.
35. exp Heparin/
36. (un?fract\* adj heparin).mp.
37. UFH.mp.
38. ((sodium or alpha) adj1 heparin).mp.
39. (Hepalean or Calcilean or Calciparine or Liquaemin or Liquemin or Multiparin or Novoheparin or Eparina or Hep-lock or Heparinate or Heparinic acid or Panheprin or Hepalean or Heparin Leo or Heparin Lock).mp.
40. or/35-39
  
41. 3 or 13 or 19 or 29 or 33 or 34 or 40
  
42. exp Thromboembolism/ or exp Venous Thromboembolism/
43. exp Pulmonary Embolism/
44. exp Venous Thrombosis/
45. Thrombophlebitis/
46. (DVT or VTE or PE).mp.
47. ((Pulmon\$ or vein or venous or lung) adj (Emboli\$ or thromb\$)).mp.
48. (thrombus\* or thrombotic\* or thrombolic\* or thromboemboli\* or thrombos\* or embol\* or thromb\*).mp.
49. (((deep or thromb\* or stasis) adj2 (vein\* or venous)) or (blood flow stasis or blood clot)).mp.
50. or/42-49
  
51. Primary Prevention/
52. Venous Thrombosis/pc [Prevention & Control]
53. Venous Thromboembolism/pc [Prevention & Control]
54. Pulmonary Embolism/pc [Prevention & Control]
55. prevent\$.mp.
56. thromboprophylax\$.mp.
57. prophyla\$.mp.
58. or/51-57
  
59. 41 and 50 and 58
  
60. exp General Surgery/
61. exp Ablation Techniques/ or exp Ambulatory Surgical Procedures/ or exp Anastomosis, Surgical/ or exp Assisted Circulation/ or exp Bariatric Surgery/ or exp Biopsy/ or exp "Bloodless Medical and Surgical Procedures"/ or exp Body Modification, Non-Therapeutic/ or exp Cardiovascular Surgical Procedures/ or exp Curettage/ or exp Cytoreduction Surgical Procedures/ or exp Debridement/ or exp Decompression, Surgical/ or exp Deep Brain Stimulation/ or exp Device Removal/ or exp Digestive System Surgical Procedures/ or exp

American Society of Hematology Guidelines for Management of Venous Thromboembolism: Prevention of Venous Thromboembolism in Surgical Hospitalized Patients

Dissection/ or exp Drainage/ or exp Elective Surgical Procedures/ or exp Electrosurgery/ or exp Endocrine Surgical Procedures/ or exp Extracorporeal Circulation/ or exp Hemostasis, Surgical/ or exp Laparotomy/ or exp Ligation/ or exp Lymph Node Excision/ or exp Mastectomy/ or exp Metastasectomy/ or exp Microsurgery/ or exp Minimally Invasive Surgical Procedures/ or exp Minor Surgical Procedures/ or exp Monitoring, Intraoperative/ or exp Neurosurgical Procedures/ or exp Ophthalmologic Surgical Procedures/ or exp Oral Surgical Procedures/ or exp Ostomy/ or exp Otorhinolaryngologic Surgical Procedures/ or exp Pelvic Exenteration/ or exp Perioperative Care/ or exp Perioperative Period/ or exp Prophylactic Surgical Procedures/ or exp Prosthesis Implantation/ or exp Punctures/ or exp Reconstructive Surgical Procedures/ or exp Reoperation/ or exp Second-Look Surgery/ or exp Splenectomy/ or exp Surgery, Computer-Assisted/ or exp Symphysiotomy/ or exp Thoracic Surgical Procedures/ or exp Transplantation/ or exp Ultrasonic Surgical Procedures/ or exp Urogenital Surgical Procedures/ or exp Wound Closure Techniques/  
62. 60 or 61

63. exp Abdomen/su

64. (General surgery or Major surgical procedure or Major general surgical or Postoperative or Post-operative or General surgical patients or Postoperative Complications or Postoperative thrombosis or Surgery or Intraoperative Complications or Preoperative Care or Postoperative care or Intraoperative Complications or postoperative hemorrhage or reoperation).mp. [mp=title, abstract, heading word, drug trade name, original title, device manufacturer, drug manufacturer, device trade name, keyword, floating subheading word]

65. 62 or 63 or 64

66. exp Thoracic Surgery/

67. exp Cardiovascular Surgical Procedures/

68. exp Thoracic Surgical Procedures/

69. thoracic surgical procedures/ or cardiac surgical procedures/

70. Cardiopulmonary Bypass/ or Heart Bypass Left/

71. ((thoracic or cardiovascular or coronary or myocardial or pericardial or vascular or aorta or aortic or aorto\* or valve or ventricular reconstructive or off pump or bypass) adj3 (surg\* or operat\*)).tw.

72. ((heart or cardiac or aortic) adj3 (surg\* or operat\*)).tw.

73. ((heart or aortocoronary or coronary or cardiopulmonary) adj3 (bypass or by pass)).tw.

74. ((valve\* or arter\*) adj3 (implant\* or graft\* or replac\* or correct\*)).tw.

75. (myocardial revasculari\* or cavopulmonary or CABG).tw.

76. (angioplast\* or (coronary adj3 balloon\*) or cardiomyoplast\*).tw.

77. (mitral valve replacement\* or aortic valve repair\* or mitral valve repair\*).tw.

78. (maze surgery or arrhythmia surgery).tw.

79. (carotid endarterectom\* or heart transplant\*).tw.

80. (ventricular adj3 (surg\* or restor\* or reconstruct\*)).tw.

81. (heart failure surgery or hypertrophic cardiomyopathy surgery).tw.

82. exp Aorta Thoracic/su

83. exp Cardiovascular Diseases/su

84. 66 or 67 or 68 or 69 or 70 or 71 or 72 or 73 or 74 or 75 or 76 or 77 or 78 or 79 or 80 or 81 or 82 or 83

85. exp Neurosurgical Procedures/

86. exp Neurosurgery/

87. exp Craniotomy/

88. exp Brain Injuries/

89. exp Intracranial Aneurysm/

90. exp Intracranial Arterial Diseases/

91. exp Cerebrovascular Disorders/

92. exp Cerebrovascular Trauma/

93. neurosurg\$ procedure\$.tw.

94. ((operat\* or surg\* or procedur\*) adj5 (brain\* or neuro\*)).mp.

95. ((Brain or Cerebro\*) adj5 (disord\* or trauma\* or damage)).mp.

American Society of Hematology Guidelines for Management of Venous Thromboembolism: Prevention of Venous Thromboembolism in Surgical Hospitalized Patients

- 96. Intracranial.mp.
- 97. 85 or 86 or 87 or 88 or 89 or 90 or 91 or 92 or 93 or 94 or 95 or 96
  
- 98. laparoscopic cholecystectomy.mp.
- 99. cholecystectomy.mp.
- 100. laparoscopic surge\$.mp.
- 101. 98 or 99 or 100
  
- 102. Urinary Incontinence/su
- 103. Prostatectomy.mp.
- 104. Urethra/su
- 105. Transurethral resection.mp.
- 106. Transurethral resection of the prostate.mp.
- 107. Prostate Transurethral Resection.mp. [mp=title, abstract, heading word, drug trade name, original title, device manufacturer, drug manufacturer, device trade name, keyword, floating subheading word]
- 108. TURP.mp.
- 109. Hematuria.mp.
- 110. Prostate hypertrophy.mp.
- 111. Suprapubic prostatectomy.mp.
- 112. 102 or 103 or 104 or 105 or 106 or 107 or 108 or 109 or 110 or 111
  
- 113. exp Gynecology/ or gynecol\$.af.
- 114. pelvic.mp. or exp Pelvic Floor/
- 115. exp Genital Neoplasms, Female/
- 116. Pelvis/su
- 117. hysteroscopy.mp. or exp Hysteroscopy/
- 118. cervix uteri/su
- 119. vaginal prolapse.mp. or exp Uterine Prolapse/
- 120. (prolapse and (urol\$ and gyn\$)).mp.
- 121. exp rectocele/ or (rectocele or rectocoele).mp.
- 122. exp cystocele/ or (cystocele or cystocoele).mp.
- 123. exp Surgical Mesh/ and (exp vagina/ or exp rectum/ or exp bladder/)
- 124. vagina/su
- 125. 113 or 114 or 115 or 116 or 117 or 118 or 119 or 120 or 121 or 122 or 123 or 124
  
- 126. 65 or 84 or 97 or 101 or 112 or 125
  
- 127. randomized controlled trial.pt.
- 128. controlled clinical trial.pt.
- 129. Clinical Trials as topic.sh.
- 130. trial.ti,ab.
- 131. factorial\*.ti,ab.
- 132. (crossover\* or cross over\*).ti,ab.
- 133. ((doubl\* or singl\*) adj blind\*).ti,ab.
- 134. (assign\* or allocat\* or volunteer\* or placebo\*).ti,ab.
- 135. placebo.ab.
- 136. random\*.ti,ab.
- 137. 127 or 128 or 129 or 130 or 131 or 132 or 133 or 134 or 135 or 136
  
- 138. animals/ not humans/
- 139. exp Animals, Laboratory/
- 140. exp Animal Experimentation/
- 141. exp Models, Animal/

## American Society of Hematology Guidelines for Management of Venous Thromboembolism: Prevention of Venous Thromboembolism in Surgical Hospitalized Patients

- 142. exp Rodentia/
- 143. (rat or rats or mouse or mice).ti.
- 144. 138 or 139 or 140 or 141 or 142 or 143
  
- 145. 137 not 144
- 146. 59 and 126 and 145

### OVERVIEW

Interface: Ovid  
Database: Embase <1974 to 2016 Week 36>  
Study Types: Randomized controlled trials

### Search Strategy: search terms

1. exp antithrombin/ or (antithrombins or antithrombotic\*).mp.
2. thrombin inhibitor/ or thrombin inhibitor.mp.
3. Factor Xa Inhibitors.mp. or exp blood clotting factor 10a inhibitor/
4. rivaroxaban/ or dabigatran etexilate/ or apixaban/ or edoxaban/ or betrixaban/ or ximelagatran/ or Darexaban/ or Otamixaban/ or Razaxaban/ or Bivalirudin/ or Desirudin/ or Lepirudin/ or Melagatran/
5. (rivaroxaban or Xarelto or apixaban or Eliquis or dabigatran etexilate or Edoxaban or Savaysa or Betrixaban or ximelagatran or pradaxa or lixiana or exanta or Darexaban or Otamixaban\$ or Razaxaban or Bivalirudin or Desirudin or Lepirudin or Melagatran or YM 150 or Iprivask or argatrovan or pradax or BIBR-953 or BIBR-953ZW or BAY 59-7939 or BMS-562247 or DU-176 or DU-176b).mp.
6. (TSOAC\$ or NOAC\$ or DOAC\$).ti,ab,kw.
7. ((Target adj Specific adj Oral adj Anticoagulant\$) or (oral adj anticoagulant\$) or (novel adj anticoagulant\$) or (new adj anticoagulant\$) or (direct\$ adj anticoagulant\$)).mp.
8. ((new or novel or direct or direct-acting or target-specific or targeted or non-vitamin K) adj3 oral anticoagulant\*).mp.
9. (factor Xa adj2 (antag\* or inhibit\*)).mp.
10. or/1-9
  
11. exp 4 hydroxycoumarin/ or exp 4 hydroxycoumarin derivative/
12. warfarin/
13. acenocoumarol/
14. coumarin/ or coumarin derivative/
15. phenindione/
16. dicoumarol derivative/ or dicoumarol/
17. phenprocoumon/
18. phepromaron/
19. ethyl biscoumacetate/
20. fluindione/ or difenacoum/ or coumatetralyl/
21. vitamin K antagonist.mp. or antivitamin K/
22. (4 hydroxycoumarin or warfarin or acenocoumarol or nicoumalone or sinthrome or Sintrom or phenindione or dicoumarol or coumadin or phenprocoumon or phepromaron or ethyl-biscoumacetate or phenindione or Diphenadione or Tiocloamarol or Racumi or Marcoumar or Marcumar or Falithrom or Coumadin or Jantoven or vitamin K antagonist\$ or VKA or fluindione or difenacoum or coumatetralyl).mp.
23. or/11-22
  
24. exp anticoagulant agent/
25. Anticoagula\$.mp.



American Society of Hematology Guidelines for Management of Venous Thromboembolism: Prevention of Venous Thromboembolism in Surgical Hospitalized Patients

26. 24 or 25

27. exp Platelet Aggregation/

28. Aspirin/

29. Aminosalicylic Acids/

30. triflusal/

31. Phosphodiesterase inhibitors/

32. Dipyridamole/

33. cilostazol/

34. Thienopyridines/

35. clopidogrel/

36. prasugrel/

37. Ticlopidine/

38. Abciximab/

39. Eptifibatide/

40. Tirofiban/

41. (Platelet Aggregation or Aspirin or Aminosalicylic Acids or Triflusal or Cilostazol or dipyridamole or Clopidogrel or Prasugrel or Ticlopidine or Tirofiban or Abciximab or Eptifibatide).mp.

42. or/27-41

43. (fondaparinux or Arixtra).mp.

44. exp Heparin/

45. (un?fract\* adj heparin).mp.

46. UFH.mp.

47. ((sodium or alpha) adj1 heparin).mp.

48. (Hepalean or Calcilean or Calciparine or Liquaemin or Liquemin or Multiparin or Novoheparin or Eparina or Hep-lock or Heparinate or Heparinic acid or Panheprin or Hepalean or Heparin Leo or Heparin Lock).mp.

49. or/44-48

50. exp heparin derivative/ or heparin\*.mp.

51. nadroparin/

52. enoxaparin/

53. dalteparin/

54. ardeparin/

55. tinzaparin/

56. certoparin/

57. reviparin/

58. danaparoid/

59. (LMWH or LMWHs or low molecular weight heparin or nadroparin or fraxiparin\* or enoxaparin\* or clexane or klexane or lovenox or dalteparin or fragmin or ardeparin\* or normiflo or tinzaparin or logiparin or innohep or certoparin or sandoparin or reviparin or clivarin\* or danaproid or danaparoid or orgaran or antixarin or bemiparin\* or hibor or zibor or ivor or badyket or semuloparin or parnaparin or tedelparin or fluxum or lohepa or lowhepa or parvoparin or seleparin\* or tedelgliparin or lomoparan or orgaran or sulodexide or zivor or embolex or xaparin or clivarine).mp.

60. (FR-860 or FR 860 or FR860 or PK-10,169 or PK 10,169 or PK10,169 or PK-10169 or PK 10169 or PK10169 or EMT-967 or EMT 967 or EMT967 or EMT-966 or EMT 966 or EMT966 or CY 216 or CY-216 or CY216 or LMF CY-216 or LMF CY 216 or LMF CY216).mp.

61. or/50-60

62. 10 or 23 or 26 or 42 or 43 or 49 or 61

63. exp vein thrombosis/

64. exp Venous Thromboembolism/

American Society of Hematology Guidelines for Management of Venous Thromboembolism: Prevention of Venous Thromboembolism in Surgical Hospitalized Patients

65. exp 'lung embolism'/
66. Thrombophlebitis/
67. (PE or DVT or VTE).mp.
68. ((Pulmon\$ or vein or venous or lung) adj (Emboli\$ or thromb\$)).mp.
69. (thrombus\* or thrombotic\* or thrombolic\* or thromboemboli\* or thrombos\* or embol\* or thromb\*).mp.
70. (((deep or thromb\* or stasis) adj2 (vein\* or venous)) or (blood flow stasis or blood clot)).mp.
71. or/63-70
  
72. primary prevention/
73. prophylaxis/
74. prevention/
75. embolism prevention/
76. thrombosis prevention/
77. vein thrombosis/pc [Prevention & Control]
78. venous thrombosis/pc [Prevention & Control]
79. Venous Thromboembolism/pc [Prevention & Control]
80. deep vein thrombosis/pc [Prevention & Control]
81. 'lung embolism'/pc [Prevention & Control]
82. prevent\$.mp.
83. thromboprophylax\$.mp.
84. prophyla\$.mp.
85. or/72-84
  
86. 62 and 71 and 85
  
87. exp General Surgery/
88. exp Ablation Techniques/ or exp Ambulatory Surgical Procedures/ or exp Anastomosis, Surgical/ or exp Assisted Circulation/ or exp Bariatric Surgery/ or exp Biopsy/ or exp "Bloodless Medical and Surgical Procedures"/ or exp Body Modification, Non-Therapeutic/ or exp Cardiovascular Surgical Procedures/ or exp Curettage/ or exp Cytorreduction Surgical Procedures/ or exp Debridement/ or exp Decompression, Surgical/ or exp Deep Brain Stimulation/ or exp Device Removal/ or exp Digestive System Surgical Procedures/ or exp Dissection/ or exp Drainage/ or exp Elective Surgical Procedures/ or exp Electrosurgery/ or exp Endocrine Surgical Procedures/ or exp Extracorporeal Circulation/ or exp Hemostasis, Surgical/ or exp Laparotomy/ or exp Ligation/ or exp Lymph Node Excision/ or exp Mastectomy/ or exp Metastasectomy/ or exp Microsurgery/ or exp Minimally Invasive Surgical Procedures/ or exp Minor Surgical Procedures/ or exp Monitoring, Intraoperative/ or exp Neurosurgical Procedures/ or exp Ophthalmologic Surgical Procedures/ or exp Oral Surgical Procedures/ or exp Ostomy/ or exp Otorhinolaryngologic Surgical Procedures/ or exp Pelvic Exenteration/ or exp Perioperative Care/ or exp Perioperative Period/ or exp Prophylactic Surgical Procedures/ or exp Prosthesis Implantation/ or exp Punctures/ or exp Reconstructive Surgical Procedures/ or exp Reoperation/ or exp Second-Look Surgery/ or exp Splenectomy/ or exp Surgery, Computer-Assisted/ or exp Symphysiotomy/ or exp Thoracic Surgical Procedures/ or exp Transplantation/ or exp Ultrasonic Surgical Procedures/ or exp Urogenital Surgical Procedures/ or exp Wound Closure Techniques/
89. exp Abdomen/su
90. (General surgery or Major surgical procedure or Major general surgical or Postoperative or Post-operative or General surgical patients or Postoperative Complications or Postoperative thrombosis or Surgery or Intraoperative Complications or Preoperative Care or Postoperative care or Intraoperative Complications or postoperative hemorrhage or reoperation).mp.
91. or/87-90
  
92. exp Thoracic Surgery/
93. exp Cardiovascular Surgical Procedures/
94. exp Thoracic Surgical Procedures/
95. thoracic surgical procedures/ or cardiac surgical procedures/

American Society of Hematology Guidelines for Management of Venous Thromboembolism: Prevention of Venous Thromboembolism in Surgical Hospitalized Patients

96. Cardiopulmonary Bypass/ or Heart Bypass Left/
97. ((thoracic or cardiovascular or coronary or myocardial or pericardial or vascular or aorta or aortic or aorto\* or valve or ventricular reconstructive or off pump or bypass) adj3 (surg\* or operat\*)).tw.
98. ((heart or cardiac or aortic) adj3 (surg\* or operat\*)).tw.
99. ((valve\* or arter\*) adj3 (implant\* or graft\* or replac\* or correct\*)).tw.
100. (myocardial revasculari\* or cavopulmonary or CABG).tw.
101. (mitral valve replacement\* or aortic valve repair\* or mitral valve repair\*).tw.
102. (maze surgery or arrhythmia surgery).tw.
103. (carotid endarterectom\* or heart transplant\*).tw.
104. (ventricular adj3 (surg\* or restor\* or reconstruct\*)).tw.
105. (heart failure surgery or hypertrophic cardiomyopathy surgery).tw.
106. exp Aorta Thoracic/su
107. exp Cardiovascular Diseases/su
108. or/92-107
  
109. exp Neurosurgical Procedures/
110. exp Neurosurgery/
111. exp Craniotomy/
112. exp Brain Injuries/
113. exp Intracranial Aneurysm/
114. exp Intracranial Arterial Diseases/
115. exp Cerebrovascular Disorders/
116. exp Cerebrovascular Trauma/
117. neurosurg\$ procedure\$.tw.
118. ((operat\* or surg\* or procedur\*) adj5 (brain\* or neuro\*)).mp.
119. ((Brain or Cerebro\*) adj5 (disord\* or trauma\* or damage)).mp.
120. Intracranial.mp.
121. or/109-120
  
122. (laparoscopic cholecystectomy or cholecystectomy or laparoscopic surger\$).mp.
123. Urinary Incontinence/su
124. Urethra/su
125. (Prostatectomy or Transurethral resection or Prostate Transurethral Resection or Transurethral resection of the prostate or TURP or Hematuria or Prostate hypertrophy or Suprapubic prostatectomy).mp.
126. 123 or 124 or 125
  
127. exp Gynecology/ or gynecol\$.af.
128. exp Pelvic Floor/
129. pelvic.mp.
130. exp Genital Neoplasms, Female/
131. Pelvis/su
132. exp Hysteroscopy/
133. hysteroscopy.mp.
134. cervix uteri/su
135. exp Uterine Prolapse/
136. vaginal prolapse.mp.
137. (prolapse and (urol\$ and gyn\$)).mp.
138. exp rectocele/ or (rectocele or rectocoele).mp.
139. exp cystocele/ or (cystocele or cystocoele).mp.
140. exp Surgical Mesh/ and (exp vagina/ or exp rectum/ or exp bladder/)
141. or/127-140
  
142. 91 or 108 or 121 or 122 or 126 or 141

## American Society of Hematology Guidelines for Management of Venous Thromboembolism: Prevention of Venous Thromboembolism in Surgical Hospitalized Patients

- 143. random\*.ti,ab.
- 144. trial.ti,ab.
- 145. factorial\*.ti,ab.
- 146. (crossover\* or cross over\*).ti,ab.
- 147. ((doubl\* or singl\*) adj blind\*).ti,ab.
- 148. (assign\* or allocat\* or volunteer\* or placebo\*).ti,ab.
- 149. placebo.ab.
- 150. crossover procedure/
- 151. single blind procedure/
- 152. randomized controlled trial/
- 153. double blind procedure/
- 154. or/143-153
  
- 155. animals/ not humans/
- 156. nonhuman/
- 157. exp Animal Experiment/
- 158. exp Experimental Animal/
- 159. animal model/
- 160. exp Rodent/
- 161. (rat or rats or mouse or mice).ti.
- 162. or/155-161
  
- 163. 154 not 162
- 164. 86 and 142 and 163

### OVERVIEW

Interface: Cochrane Library  
Databases: Cochrane Central Register of Controlled Trials (CENTRAL)  
Study Types: Randomized controlled trials

### Search Strategy: search terms

- #1 MeSH descriptor: [Heparin] explode all trees
- #2 (UFH or Unfractionated Heparin or Heparin, Unfractionated or Sodium Heparin or Heparin, Sodium or Heparin Sodium or alpha-Heparin or alpha Heparin or Hepalean or Calcilean or Calciparine or Liquaemin or Liquemin or Multiparin or Novoheparin or Eparina or Hep-lock or Heparinate or Heparinic acid or Panheprin or Hepalean or Heparin Leo or Heparin Lock):ti,ab,kw
- #3 #1 or #2
  
- #4 MeSH descriptor: [Antithrombins] explode all trees
- #5 MeSH descriptor: [Factor Xa Inhibitors] explode all trees
- #6 rivaroxaban or Xarelto or apixaban or Eliquis or dabigatran etexilate or Edoxaban or Savaysa or Betrixaban or ximelagatran or pradaxa or lixiana or exanta or Darexaban or Otamixaban\* or Razaxaban or Bivalirudin or Desirudin or Lepirudin or Melagatran or YM 150 or Iprivask or argatrovan or pradax or BIBR953 or BIBR953ZW or BAY 597939 or BMS562247 or DU176 or DU176b
- #7 ((Target near Specific adjOral near Anticoagulant\*) or (oral near anticoagulant\*) or (novel near anticoagulant\*) or (new near anticoagulant\*) or (direc\* near anticoagulant\*))
- #8 ((new or novel or direct or direct-acting or target-specific or targeted or non-vitamin K) near/3 oral anticoagulant\*)

American Society of Hematology Guidelines for Management of Venous Thromboembolism: Prevention of Venous Thromboembolism in Surgical Hospitalized Patients

- #9 (factorXa near/2 (antag\* or inhibit\*))
- #10 #4 or #5 or #6 or #7 or #8 or #9
  
- #11 MeSH descriptor: [Anticoagulants] explode all trees
- #12 (Anticoagulant or anticoagulation):ti,ab,kw
- #13 antithromb\*
- #14 #11 or #12 or #13
  
- #15 MeSH descriptor: [Platelet Aggregation] explode all trees
- #16 MeSH descriptor: [Aspirin] explode all trees
- #17 MeSH descriptor: [Aminosalicylic Acids] explode all trees
- #18 MeSH descriptor: [Phosphodiesterase Inhibitors] this term only
- #19 MeSH descriptor: [Dipyridamole] explode all trees
- #20 MeSH descriptor: [Thienopyridines] explode all trees
- #21 MeSH descriptor: [Ticlopidine] 11 tree(s) exploded
- #22 MeSH descriptor: [Prasugrel Hydrochloride] this term only
- #23 (Platelet Aggregation or Aspirin or Aminosalicylic Acids or Triflusal or Cilostazol or dipyridamole or Clopidogrel or Prasugrel or Ticlopidine or Tirofiban or Abciximab or Eptifibatide)
- #24 #15 or #16 or #17 or #18 or #19 or #20 or #21 or #22 or #23
  
- #25 fondaparinux or Arixtra
- #26 MeSH descriptor: [Heparin] explode all trees
- #27 MeSH descriptor: [Heparin, Low-Molecular-Weight] explode all trees
- #28 MeSH descriptor: [Heparinoids] this term only
- #29 MeSH descriptor: [Dalteparin] this term only
- #30 MeSH descriptor: [Enoxaparin] this term only
- #31 MeSH descriptor: [Nadroparin] this term only
- #32 (LMWH or LMWHs or low molecular weight heparin or heparin\* or nadroparin or fraxiparin\* or enoxaparin\* or clexane or klexane or lovenox or dalteparin or fragmin or ardeparin\* or normiflo or tinzaparin or logiparin or innohep or certoparin or sandoparin or reviparin or clivarin\* or danaproid or danaparoid or orgaran or antixarin or bemiparin\* or hibor or zibor or ivor or badyket or semuloparin or parnaparin or tedelparin or fluxum or lohepa or lowhepa or parvoparin or seleparin\* or tedelgliparin or lomoparan or orgaran or sulodexide or zivor or embolox or xaparin or clivarine)
- #33 (FR-860 or FR 860 or FR860 or PK-10,169 or PK 10,169 or PK10,169 or PK-10169 or PK 10169 or PK10169 or EMT-967 or EMT 967 or EMT967 or EMT-966 or EMT 966 or EMT966 or CY 216 or CY-216 or CY216 or LMF CY-216 or LMF CY 216 or LMF CY216)
- #34 #26 or #27 or #28 or #29 or #30 or #31 or #32 or #33
  
- #35 MeSH descriptor: [Warfarin] explode all trees
- #36 MeSH descriptor: [Acenocoumarol] explode all trees
- #37 MeSH descriptor: [Phenindione] explode all trees
- #38 MeSH descriptor: [Coumarins] explode all trees
- #39 MeSH descriptor: [Dicumarol] explode all trees
- #40 MeSH descriptor: [Phenprocoumon] explode all trees
- #41 MeSH descriptor: [Ethyl Biscoumacetate] explode all trees
- #42 MeSH descriptor: [4-Hydroxycoumarins] explode all trees
- #43 MeSH descriptor: [Phenprocoumon] explode all trees
- #44 (4 hydroxycoumarin or warfarin or acenocoumarol or nicoumalone or sinthrome or Sintrom or phenindione or dicoumarol or coumadin or phenprocoumon or phepromaron or ethyl-biscoumacetate or phenindione or Diphenadione or Tioclomarol or Racumi or Marcoumar or Marcumar or Falithrom or Coumadin or Jantoven or vitamin K antagonist\* or VKA or fluidione or difenacoum or coumatetralyl)
- #45 #35 or #36 or #37 or #38 or #39 or #40 or #41 or #42 or #43 or #44

American Society of Hematology Guidelines for Management of Venous Thromboembolism: Prevention of Venous Thromboembolism in Surgical Hospitalized Patients

- #46 #3 or #10 or #14 or #24 or #25 or #34 or #45
- #47 MeSH descriptor: [Venous Thromboembolism] explode all trees
- #48 MeSH descriptor: [Pulmonary Embolism] explode all trees
- #49 MeSH descriptor: [Thrombophlebitis] this term only
- #50 (DVT or VTE or PE)
- #51 ((Pulmon\* or vein or venous or lung) near (Emboli\* or thromb\*))
- #52 (Thrombus\* or thrombotic\* or thrombolic\* or thromboemboli\* or thrombos\* or embol\*)
- #53 (((deep or thromb\* or stasis) near/2 (vein\* or venous)) or (blood flow stasis or blood clot))
- #54 #47 or #48 or #49 or #50 or #51 or #52 or #53
- #55 MeSH descriptor: [Primary Prevention] this term only
- #56 MeSH descriptor: [Venous Thrombosis] explode all trees and with qualifier(s): [prevention & control - PC]
- #57 MeSH descriptor: [Venous Thromboembolism] explode all trees and with qualifier(s): [prevention & control - PC]
- #58 MeSH descriptor: [Pulmonary Embolism] explode all trees and with qualifier(s): [prevention & control - PC]
- #59 prevent\*
- #60 thromboprophylax\*
- #61 prophyla\*
- #62 #55 or #56 or #57 or #58 or #59 or #60 or #61
  
- #63 #46 and #54 and #62
  
- #64 MeSH descriptor: [General Surgery] explode all trees
- #65 MeSH descriptor: [Ablation Techniques] explode all trees
- #66 MeSH descriptor: [Ambulatory Surgical Procedures] explode all trees
- #67 MeSH descriptor: [Anastomosis, Surgical] explode all trees
- #68 MeSH descriptor: [Assisted Circulation] explode all trees
- #69 MeSH descriptor: [Bariatric Surgery] explode all trees
- #70 MeSH descriptor: [Biopsy] explode all trees
- #71 MeSH descriptor: [Bloodless Medical and Surgical Procedures] explode all trees
- #72 MeSH descriptor: [Body Modification, Non-Therapeutic] explode all trees
- #73 MeSH descriptor: [Cardiovascular Surgical Procedures] explode all trees
- #74 MeSH descriptor: [Cytoreduction Surgical Procedures] explode all trees
- #75 MeSH descriptor: [Debridement] explode all trees
- #76 MeSH descriptor: [Decompression, Surgical] explode all trees
- #77 MeSH descriptor: [Deep Brain Stimulation] explode all trees
- #78 MeSH descriptor: [Curettage] explode all trees
- #79 MeSH descriptor: [Device Removal] explode all trees
- #80 MeSH descriptor: [Digestive System Surgical Procedures] explode all trees
- #81 MeSH descriptor: [Dissection] explode all trees
- #82 MeSH descriptor: [Drainage] explode all trees
- #83 MeSH descriptor: [Elective Surgical Procedures] explode all trees
- #84 MeSH descriptor: [Electrosurgery] explode all trees
- #85 MeSH descriptor: [Endocrine Surgical Procedures] explode all trees
- #86 MeSH descriptor: [Extracorporeal Circulation] explode all trees
- #87 MeSH descriptor: [Hemostasis, Surgical] explode all trees
- #88 MeSH descriptor: [Laparotomy] explode all trees
- #89 MeSH descriptor: [Ligation] explode all trees
- #90 MeSH descriptor: [Lymph Node Excision] explode all trees
- #91 MeSH descriptor: [Mastectomy] explode all trees
- #92 MeSH descriptor: [Metastasectomy] explode all trees

American Society of Hematology Guidelines for Management of Venous Thromboembolism: Prevention of Venous Thromboembolism in Surgical Hospitalized Patients

- #93 MeSH descriptor: [Microsurgery] explode all trees
- #94 MeSH descriptor: [Minimally Invasive Surgical Procedures] explode all trees
- #95 MeSH descriptor: [Minor Surgical Procedures] explode all trees
- #96 MeSH descriptor: [Monitoring, Intraoperative] explode all trees
- #97 MeSH descriptor: [Neurosurgical Procedures] explode all trees
- #98 MeSH descriptor: [Ophthalmologic Surgical Procedures] explode all trees
- #99 MeSH descriptor: [Oral Surgical Procedures] explode all trees
- #100 MeSH descriptor: [Ostomy] explode all trees
- #101 MeSH descriptor: [Otorhinolaryngologic Surgical Procedures] explode all trees
- #102 MeSH descriptor: [Pelvic Exenteration] explode all trees
- #103 MeSH descriptor: [Perioperative Care] explode all trees
- #104 MeSH descriptor: [Perioperative Period] explode all trees
- #105 MeSH descriptor: [Prophylactic Surgical Procedures] explode all trees
- #106 MeSH descriptor: [Prosthesis Implantation] explode all trees
- #107 MeSH descriptor: [Punctures] explode all trees
- #108 MeSH descriptor: [Reconstructive Surgical Procedures] explode all trees
- #109 MeSH descriptor: [Reoperation] explode all trees
- #110 MeSH descriptor: [Second-Look Surgery] explode all trees
- #111 MeSH descriptor: [Splenectomy] explode all trees
- #112 MeSH descriptor: [Surgery, Computer-Assisted] explode all trees
- #113 MeSH descriptor: [Symphysiotomy] explode all trees
- #114 MeSH descriptor: [Thoracic Surgical Procedures] explode all trees
- #115 MeSH descriptor: [Transplantation] explode all trees
- #116 MeSH descriptor: [Ultrasonic Surgical Procedures] explode all trees
- #117 MeSH descriptor: [Urogenital Surgical Procedures] explode all trees
- #118 MeSH descriptor: [Wound Closure Techniques] explode all trees
- #119 #64 or #65 or #66 or #67 or #68 or #69 or #70 or #71 or #72 or #73 or #74 or #75 or #76 or #77 or #78 or #79 or #80 or #81 or #82 or #83 or #84 or #85 or #86 or #87 or #88 or #89 or #90 or #91 or #92 or #93 or #94 or #95 or #96 or #97 or #98 or #99 or #100 or #101 or #102 or #103 or #104 or #105 or #106 or #107 or #108 or #109 or #110 or #111 or #112 or #113 or #114 or #115 or #116 or #117 or #118
- #120 MeSH descriptor: [Abdomen] explode all trees and with qualifier(s): [surgery - SU]
- #121 (General surgery or Major surgical procedure or Major general surgical or Postoperative or Postoperative or General surgical patients or Postoperative Complications or Postoperative thrombosis or Surgery or Intraoperative Complications or Preoperative Care or Postoperative care or Intraoperative Complications or postoperative hemorrhage or reoperation):ti,ab,kw
- #122 #120 or #121
- #123 MeSH descriptor: [Thoracic Surgery] explode all trees
- #124 MeSH descriptor: [Cardiovascular Surgical Procedures] explode all trees
- #125 MeSH descriptor: [Thoracic Surgical Procedures] explode all trees
- #126 (thoracic surgical procedures or cardiac surgical procedures)
- #127 (Cardiopulmonary Bypass or Heart Bypass Left)
- #128 ((thoracic or cardiovascular or coronary or myocardial or pericardial or vascular or aorta or aortic or aorto\* or valve or ventricular reconstructive or off pump or bypass) near/3 (surg\* or operat\*))
- #129 ((heart or cardiac or aortic) near/3 (surg\* or operat\*))
- #130 ((valve\* or arter\*) near/3 (implant\* or graft\* or replac\* or correct\*))
- #131 (myocardial revasculari\* or cavopulmonary or CABG)
- #132 (mitral valve replacement\* or aortic valve repair\* or mitral valve repair\*)
- #133 (maze surgery or arrhythmia surgery)
- #134 (carotid endarterectom\* or heart transplant\*)
- #135 (ventricular near/3 (surg\* or restor\* or reconstruct\*))
- #136 (heart failure surgery or hypertrophic cardiomyopathy surgery)

American Society of Hematology Guidelines for Management of Venous Thromboembolism: Prevention of Venous Thromboembolism in Surgical Hospitalized Patients

- #137 MeSH descriptor: [Aorta, Thoracic] explode all trees and with qualifier(s): [surgery - SU]
- #138 MeSH descriptor: [Cardiovascular Diseases] explode all trees and with qualifier(s): [surgery - SU]
- #139 #123 or #124 or #125 or #126 #127 or #128 or #129 or #130 or #131 or #132 or #133 or 134 or #135 or #136 or #137 or #138
- #140 MeSH descriptor: [Neurosurgical Procedures] explode all trees
- #141 MeSH descriptor: [Neurosurgery] explode all trees
- #142 MeSH descriptor: [Craniotomy] explode all trees
- #143 MeSH descriptor: [Brain Injuries] explode all trees
- #144 MeSH descriptor: [Intracranial Aneurysm] explode all trees
- #145 MeSH descriptor: [Intracranial Arterial Diseases] explode all trees
- #146 MeSH descriptor: [Cerebrovascular Disorders] explode all trees
- #147 MeSH descriptor: [Cerebrovascular Trauma] explode all trees
- #148 neurosurg\* procedure\*
- #149 ((operat\* or surg\* or procedur\*) near/5 (brain\* or neuro\*))
- #150 ((Brain or Cerebro\*) near/5 (disord\* or trauma\* or damage))
- #151 Intracranial
- #152 #140 or #141 or #142 or #143 or #144 or #145 or #146 or #147 or #148 or #149 or #150 or #151
  
- #153 (laparoscopic cholecystectomy or cholecystectomy or laparoscopic surger\*)
- #154 MeSH descriptor: [Urinary Incontinence] explode all trees and with qualifier(s): [surgery - SU]
- #155 MeSH descriptor: [Urethra] explode all trees and with qualifier(s): [surgery - SU]
- #156 MeSH descriptor: [Prostate] explode all trees and with qualifier(s): [surgery - SU]
- #157 (Prostatectomy or Transurethral resection or Prostate Transurethral Resection or Transurethral resection of the prostate or TURP or Hematuria or Prostate hypertrophy or Suprapubic prostatectomy)
- #158 #154 or #155 or #156 or #157
  
- #159 MeSH descriptor: [Gynecology] explode all trees
- #160 MeSH descriptor: [Pelvic Floor] explode all trees
- #161 (pelvic or vaginal prolapse)
- #162 MeSH descriptor: [Genital Neoplasms, Female] explode all trees
- #163 MeSH descriptor: [Pelvis] explode all trees and with qualifier(s): [surgery - SU]
- #164 MeSH descriptor: [Hysteroscopy] explode all trees
- #165 MeSH descriptor: [Cervix Uteri] explode all trees and with qualifier(s): [surgery - SU]
- #166 MeSH descriptor: [Uterine Prolapse] explode all trees
- #167 (prolapse and (urol\* and gyn\*))
- #168 MeSH descriptor: [Rectocele] explode all trees
- #169 (rectocele or rectocoele)
- #170 MeSH descriptor: [Cystocele] explode all trees
- #171 (cystocele or cystocoele)
- #172 MeSH descriptor: [Surgical Mesh] explode all trees
- #173 MeSH descriptor: [Vagina] explode all trees
- #174 MeSH descriptor: [Rectum] explode all trees
- #175 MeSH descriptor: [Urinary Bladder] explode all trees
- #176 #173 or #174 or #175
  
- #177 #172 and #176
  
- #178 #159 or #160 or #161 or #162 or #163 or #164 or #165 or #166 or #167 or #168 or #169 or #170 or #171 or #177
  
- #179 #119 or #122 or #139 or #152 or #153 or #158 or #178
- #180 #63 and #179



**Recommendation 19-20:**

**Pharmacological prophylaxis in surgical hospitalized patients undergoing major neurosurgical procedures.**

| OVERVIEW                      |                                                                                                                                                                                                                                                                                                                                                                                                                                                                                                                                                                                                        |
|-------------------------------|--------------------------------------------------------------------------------------------------------------------------------------------------------------------------------------------------------------------------------------------------------------------------------------------------------------------------------------------------------------------------------------------------------------------------------------------------------------------------------------------------------------------------------------------------------------------------------------------------------|
| Interface:                    | Ovid                                                                                                                                                                                                                                                                                                                                                                                                                                                                                                                                                                                                   |
| Databases:                    | Medline, and Medline In-Process & Other Non-Indexed Citations (1946-present)                                                                                                                                                                                                                                                                                                                                                                                                                                                                                                                           |
| Study Types:                  | Observational studies                                                                                                                                                                                                                                                                                                                                                                                                                                                                                                                                                                                  |
| Search Strategy: search terms |                                                                                                                                                                                                                                                                                                                                                                                                                                                                                                                                                                                                        |
| 1                             | exp anticoagulant agent/ (225909)                                                                                                                                                                                                                                                                                                                                                                                                                                                                                                                                                                      |
| 2                             | Anticoagula\$.mp. (115682)                                                                                                                                                                                                                                                                                                                                                                                                                                                                                                                                                                             |
| 3                             | or/1-2 (261205)                                                                                                                                                                                                                                                                                                                                                                                                                                                                                                                                                                                        |
| 4                             | (Antithrombins or antithrombotic*).mp. or exp Antithrombins/ (34602)                                                                                                                                                                                                                                                                                                                                                                                                                                                                                                                                   |
| 5                             | thrombin inhibitor/ or thrombin inhibitor.mp. (2938)                                                                                                                                                                                                                                                                                                                                                                                                                                                                                                                                                   |
| 6                             | Factor Xa Inhibitors.mp. or exp Factor Xa Inhibitors/ (4838)                                                                                                                                                                                                                                                                                                                                                                                                                                                                                                                                           |
| 7                             | rivaroxaban/ or dabigatran etexilate/ or apixaban/ or edoxaban/ or betrixaban/ or ximelagatran/ (3106)                                                                                                                                                                                                                                                                                                                                                                                                                                                                                                 |
| 8                             | (rivaroxaban or Xarelto or apixaban or Eliquis or dabigatran etexilate or Edoxaban or Savaysa or Betrixaban or ximelagatran or pradaxa or lixiana or exanta or Darexaban or Otamixaban\$ or Razaxaban or Bivalirudin or Desirudin or Lepirudin or Melagatran or YM 150 or Iprivask or argatrovan or pradax or BIBR-953 or BIBR-953ZW or BAY 59-7939 or BMS-562247 or DU-176 or DU-176b).mp. (7602)                                                                                                                                                                                                     |
| 9                             | (TSOAC\$ or NOAC\$ or DOAC\$).ti,ab,kw. (1609)                                                                                                                                                                                                                                                                                                                                                                                                                                                                                                                                                         |
| 10                            | ((Target adj Specific adj Oral adj Anticoagulant\$) or (oral adj anticoagulant\$) or (novel adj anticoagulant\$) or (new adj anticoagulant\$) or (direc\$ adj anticoagulant\$)).mp. (10621)                                                                                                                                                                                                                                                                                                                                                                                                            |
| 11                            | ((new or novel or direct or direct-acting or target-specific or targeted or non-vitamin K) adj3 oral anticoagulant*).mp. (3630)                                                                                                                                                                                                                                                                                                                                                                                                                                                                        |
| 12                            | (factor Xa adj2 (antag* or inhibit*)).mp. (4968)                                                                                                                                                                                                                                                                                                                                                                                                                                                                                                                                                       |
| 13                            | or/4-12 (45491)                                                                                                                                                                                                                                                                                                                                                                                                                                                                                                                                                                                        |
| 14                            | exp Heparin/ or heparin.mp. (102379)                                                                                                                                                                                                                                                                                                                                                                                                                                                                                                                                                                   |
| 15                            | exp Heparin, Low-Molecular-Weight/ (11822)                                                                                                                                                                                                                                                                                                                                                                                                                                                                                                                                                             |
| 16                            | dalteparin/ or enoxaparin/ or nadroparin/ or heparinoids/ (5249)                                                                                                                                                                                                                                                                                                                                                                                                                                                                                                                                       |
| 17                            | (LMWH or LMWHs or low molecular weight heparin or nadroparin or fraxiparin* or enoxaparin* or clexane or klexane or lovenox or dalteparin or fragmin or ardeparin* or normiflo or tinzaparin or logiparin or innohep or certoparin or sandoparin or reviparin or clivarin* or danaproid or danaparoid or organan or antixarin or bemiparin* or hibor or zibor or ivor or badyket or semuloparin or parnaparin or tedelparin or fluxum or lohepa or lowhepa or parvoparin or seleparin* or tedelgliparin or lomoparan or organan or sulodexide or zivor or embolex or xaparin or clivarine).mp. (16220) |
| 18                            | (FR-860 or FR 860 or FR860 or PK-10,169 or PK 10,169 or PK10,169 or PK-10169 or PK 10169 or PK10169 or EMT-967 or EMT 967 or EMT967 or EMT-966 or EMT 966 or EMT966 or CY 216 or CY-216 or CY216 or LMF CY-216 or LMF CY 216 or LMF CY216).mp. (134)                                                                                                                                                                                                                                                                                                                                                   |
| 19                            | or/14-18 (104265)                                                                                                                                                                                                                                                                                                                                                                                                                                                                                                                                                                                      |
| 20                            | exp Platelet Aggregation/ (33771)                                                                                                                                                                                                                                                                                                                                                                                                                                                                                                                                                                      |
| 21                            | Aspirin/ (45164)                                                                                                                                                                                                                                                                                                                                                                                                                                                                                                                                                                                       |
| 22                            | Aminosalicylic Acids/ (4328)                                                                                                                                                                                                                                                                                                                                                                                                                                                                                                                                                                           |
| 23                            | Phosphodiesterase inhibitors/ (12913)                                                                                                                                                                                                                                                                                                                                                                                                                                                                                                                                                                  |
| 24                            | Dipyridamole/ (8626)                                                                                                                                                                                                                                                                                                                                                                                                                                                                                                                                                                                   |
| 25                            | Thienopyridines/ (205)                                                                                                                                                                                                                                                                                                                                                                                                                                                                                                                                                                                 |
| 26                            | Ticlopidine/ (9917)                                                                                                                                                                                                                                                                                                                                                                                                                                                                                                                                                                                    |
| 27                            | Prasugrel Hydrochloride/ (1060)                                                                                                                                                                                                                                                                                                                                                                                                                                                                                                                                                                        |
| 28                            | (Platelet Aggregation or Aspirin or Aminosalicylic Acids or Triflusal or Cilostazol or dipyridamole or Clopidogrel or Prasugrel or Ticlopidine or Tirofiban or Abciximab or Eptifibatide).mp. (138275)                                                                                                                                                                                                                                                                                                                                                                                                 |

American Society of Hematology Guidelines for Management of Venous Thromboembolism: Prevention of Venous Thromboembolism in Surgical Hospitalized Patients

- 29 or/20-28 (150550)
- 30 exp 4-Hydroxycoumarins/ or warfarin/ or acenocoumarol/ or dicumarol/ or Coumarins/ or coumarin anticoagulant/ or ethyl biscoumacetate/ or phenprocoumon/ or phenindione/ (36287)
- 31 vitamin K antagonist\$.mp. (4166)
- 32 (4-Hydroxycoumarins or warfarin or acenocoumarol or nicoumalone or sinthrome or Sintrom or phenindione or dicoumarol or coumadin or phenprocoumon or phepromaron or ethyl-biscoumacetate or phenindione or Diphenadione or Tiocloamarol or Racumi or Marcoumar or Marcumar or Falithrom or Coumadin or Jantoven or vitamin K antagonist\$ or VKA or fluindione or difenacoum or coumatetralyl).mp. (35700)
- 33 30 or 31 or 32 (49348)
- 34 (fondaparinux or Arixtra).mp. (1849)
- 35 exp Heparin/ (67048)
- 36 (un?fract\* adj heparin).mp. (5580)
- 37 UFH.mp. (1961)
- 38 ((sodium or alpha) adj1 heparin).mp. (991)
- 39 (Hepalean or Calcilean or Calciparine or Liquaemin or Liquemin or Multiparin or Novoheparin or Eparina or Hep-lock or Heparinate or Heparinic acid or Panheprin or Hepalean or Heparin Leo or Heparin Lock).mp. (562)
- 40 or/35-39 (69047)
- 41 3 or 13 or 19 or 29 or 33 or 34 or 40 (437559)
- 42 exp Thromboembolism/ or exp Venous Thromboembolism/ (55264)
- 43 exp Pulmonary Embolism/ (39545)
- 44 exp Venous Thrombosis/ (55077)
- 45 Thrombophlebitis/ (24612)
- 46 (DVT or VTE or PE).mp. (48010)
- 47 ((Pulmon\$ or vein or venous or lung) adj (Emboli\$ or thromb\$)).mp. (108923)
- 48 (thrombus\* or thrombotic\* or thrombolic\* or thromboemboli\* or thrombos\* or embol\* or thromb\*).mp. (591158)
- 49 (((deep or thromb\* or stasis) adj2 (vein\* or venous)) or (blood flow stasis or blood clot)).mp. (79486)
- 50 or/42-49 (629656)
- 51 Primary Prevention/ (17783)
- 52 Venous Thrombosis/pc [Prevention & Control] (4409)
- 53 Venous Thromboembolism/pc [Prevention & Control] (3415)
- 54 Pulmonary Embolism/pc [Prevention & Control] (5168)
- 55 prevent\$.mp. (1350235)
- 56 thromboprophylax\$.mp. (3921)
- 57 prophyla\$.mp. (165946)
- 58 or/51-57 (1467626)
- 59 41 and 50 and 58 (35137)
- 60 exp Neurosurgical Procedures/ (184043)
- 61 exp Neurosurgery/ (16304)
- 62 exp Craniotomy/ (14257)
- 63 exp Brain Injuries/ (65083)
- 64 exp Intracranial Aneurysm/ (28195)
- 65 exp Intracranial Arterial Diseases/ (63742)
- 66 exp Cerebrovascular Disorders/ (371291)
- 67 exp Cerebrovascular Trauma/ (7069)
- 68 neurosurg\$ procedure\$.tw. (3004)
- 69 ((operat\* or surg\* or procedur\*) adj5 (brain\* or neuro\*)).mp. (74708)
- 70 ((Brain or Cerebro\*) adj5 (disord\* or trauma\* or damage)).mp. (144475)
- 71 Intracranial.mp. (161436)
- 72 or/60-71 (752908)
- 73 59 and 72 (5011)

## American Society of Hematology Guidelines for Management of Venous Thromboembolism: Prevention of Venous Thromboembolism in Surgical Hospitalized Patients

- 74 exp cohort studies/ (1789334)
- 75 cohort\$.tw. (465578)
- 76 controlled clinical trial.pt. (97909)
- 77 epidemiologic methods/ (33781)
- 78 limit 4 to yr=1966-1989 (5332)
- 79 exp case-control studies/ (908352)
- 80 (case\$ and control\$).tw. (447642)
- 81 or/74-76,78-80 (2552657)
- 82 73 and 81 (1176)

### OVERVIEW

Interface: Ovid  
Databases: Embase <1974 to 2016 Week 36>  
Study Types: Observational studies

### Search Strategy: search terms

- 1 exp antithrombin/ or (antithrombins or antithrombotic\*).mp.
- 2 thrombin inhibitor/ or thrombin inhibitor.mp.
- 3 Factor Xa Inhibitors.mp. or exp blood clotting factor 10a inhibitor/
- 4 rivaroxaban/ or dabigatran etexilate/ or apixaban/ or edoxaban/ or betrixaban/ or ximelagatran/ or Darexaban/ or Otamixaban/ or Razaxaban/ or Bivalirudin/ or Desirudin/ or Lepirudin/ or Melagatran/
- 5 (rivaroxaban or Xarelto or apixaban or Eliquis or dabigatran etexilate or Edoxaban or Savaysa or Betrixaban or ximelagatran or pradaxa or lixiana or exanta or Darexaban or Otamixaban\$ or Razaxaban or Bivalirudin or Desirudin or Lepirudin or Melagatran or YM 150 or lprivask or argatrovan or pradax or BIBR-953 or BIBR-953ZW or BAY 59-7939 or BMS-562247 or DU-176 or DU-176b).mp.
- 6 (TSOAC\$ or NOAC\$ or DOAC\$).ti,ab,kw.
- 7 ((Target adj Specific adj Oral adj Anticoagulant\$) or (oral adj anticoagulant\$) or (novel adj anticoagulant\$) or (new adj anticoagulant\$) or (direc\$ adj anticoagulant\$)).mp.
- 8 ((new or novel or direct or direct-acting or target-specific or targeted or non-vitamin K) adj3 oral anticoagulant\*).mp.
- 9 (factor Xa adj2 (antag\* or inhibit\*)).mp.
- 10 or/1-9
- 11 exp 4 hydroxycoumarin/ or exp 4 hydroxycoumarin derivative/
- 12 warfarin/
- 13 acenocoumarol/
- 14 coumarin/ or coumarin derivative/
- 15 phenindione/
- 16 dicoumarol derivative/ or dicoumarol/
- 17 phenprocoumon/
- 18 phepromaron/
- 19 ethyl biscoumacetate/
- 20 fluindione/ or difenacoum/ or coumatetralyl/
- 21 vitamin K antagonist.mp. or antivitamin K/
- 22 (4 hydroxycoumarin or warfarin or acenocoumarol or nicoumalone or sinthrome or Sintrom or phenindione or dicoumarol or coumadin or phenprocoumon or phepromaron or ethyl-biscoumacetate or phenindione or Diphenadione or Tiocloamarol or Racumi or Marcoumar or Marcumar or Falithrom or Coumadin or Jantoven or vitamin K antagonist\$ or VKA or fluindione or difenacoum or coumatetralyl).mp.
- 23 or/11-22
- 24 exp anticoagulant agent/
- 25 Anticoagula\$.mp.

American Society of Hematology Guidelines for Management of Venous Thromboembolism: Prevention of Venous Thromboembolism in Surgical Hospitalized Patients

- 26 24 or 25  
27 exp Platelet Aggregation/  
28 Aspirin/  
29 Aminosalicylic Acids/  
30 triflusal/  
31 Phosphodiesterase inhibitors/  
32 Dipyridamole/  
33 cilostazol/  
34 Thienopyridines/  
35 clopidogrel/  
36 prasugrel/  
37 Ticlopidine/  
38 Abciximab/  
39 Eptifibatide/  
40 Tirofiban/  
41 (Platelet Aggregation or Aspirin or Aminosalicylic Acids or Triflusal or Cilostazol or dipyridamole or Clopidogrel or Prasugrel or Ticlopidine or Tirofiban or Abciximab or Eptifibatide).mp.  
42 or/27-41  
43 (fondaparinux or Arixtra).mp.  
44 exp Heparin/  
45 (un?fract\* adj heparin).mp.  
46 UFH.mp.  
47 ((sodium or alpha) adj1 heparin).mp.  
48 (Hepalean or Calcilean or Calciparine or Liquaemin or Liquemin or Multiparin or Novoheparin or Eparina or Hep-lock or Heparinate or Heparinic acid or Panheprin or Hepalean or Heparin Leo or Heparin Lock).mp.  
49 or/44-48  
50 exp heparin derivative/ or heparin\*.mp.  
51 nadroparin/  
52 enoxaparin/  
53 dalteparin/  
54 ardeparin/  
55 tinzaparin/  
56 certoparin/  
57 reviparin/  
58 danaparoid/  
59 (LMWH or LMWHs or low molecular weight heparin or nadroparin or fraxiparin\* or enoxaparin\* or clexane or klexane or lovenox or dalteparin or fragmin or ardeparin\* or normiflo or tinzaparin or logiparin or innohep or certoparin or sandoparin or reviparin or clivarin\* or danaproid or danaparoid or organan or antixarin or bemiparin\* or hibor or zibor or ivor or badyket or semuloparin or parnaparin or tedelparin or fluxum or lohepa or lowhepa or parvoparin or seleparin\* or tedelgliparin or lomoparan or organan or sulodexide or zivor or embolex or xaparin or clivarine).mp.  
60 (FR-860 or FR 860 or FR860 or PK-10,169 or PK 10,169 or PK10,169 or PK-10169 or PK 10169 or PK10169 or EMT-967 or EMT 967 or EMT967 or EMT-966 or EMT 966 or EMT966 or CY 216 or CY-216 or CY216 or LMF CY-216 or LMF CY 216 or LMF CY216).mp  
61 or/50-60  
  
62 10 or 23 or 26 or 42 or 43 or 49 or 61  
  
63 exp vein thrombosis/  
64 exp Venous Thromboembolism/  
65 exp 'lung embolism'/  
66 Thrombophlebitis/

American Society of Hematology Guidelines for Management of Venous Thromboembolism: Prevention of Venous Thromboembolism in Surgical Hospitalized Patients

- 67 (PE or DVT or VTE).mp.
- 68 ((Pulmon\$ or vein or venous or lung) adj (Emboli\$ or thromb\$)).mp.
- 69 (thrombus\* or thrombotic\* or thrombolic\* or thromboemboli\* or thrombos\* or embol\* or thromb\*).mp.
- 70 (((deep or thromb\* or stasis) adj2 (vein\* or venous)) or (blood flow stasis or blood clot)).mp.
- 71 or/63-70
  
- 72 primary prevention/
- 73 prophylaxis/
- 74 prevention/
- 75 embolism prevention/
- 76 thrombosis prevention/
- 77 vein thrombosis/pc [Prevention & Control]
- 78 venous thrombosis/pc [Prevention & Control]
- 79 Venous Thromboembolism/pc [Prevention & Control]
- 80 deep vein thrombosis/pc [Prevention & Control]
- 81 'lung embolism'/pc [Prevention & Control]
- 82 prevent\$.mp.
- 83 thromboprophylax\$.mp.
- 84 prophyla\$.mp.
- 85 or/72-84
  
- 86 62 and 71 and 85
  
- 87 exp neurosurgery/
- 88 exp craniotomy/
- 89 exp brain injury/
- 90 exp intracranial aneurysm/
- 91 exp cerebral artery disease/
- 92 exp brain hemorrhage/
- 93 exp cerebrovascular accident/
- 94 exp cerebrovascular disease/
- 95 exp cerebrovascular surgery/
- 96 neurosurg\$ procedure\$.ti,ab.
- 97 ((operat\* or surg\* or procedur\*) adj5 (brain\* or neuro\*)).mp.
- 98 ((Brain or Cerebro\*) adj5 (disord\* or trauma\* or damage)).mp.
- 99 Intracranial.mp.
- 100 or/87-99
- 101 86 and 100
  
- 102 exp cohort analysis/
- 103 exp longitudinal study/
- 104 exp prospective study/
- 105 exp follow up/
- 106 cohort\$.tw.
- 107 exp case control study/
- 108 (case\$ and control\$).tw.
- 109 102 or 103 or 104 or 105 or 106 or 107 or 108
  
- 110 101 and 109
