# Supplementary material
Source: PubMed Central journal article supplement (PMC6963238)
Supplement: baADV2019000975-suppl5.pdf [file baADV2019000975-suppl5.pdf]

American Society of Hematology Guidelines for Management of Venous Thromboembolism: Prevention of Venous Thromboembolism in Surgical Hospitalized Patients

**Question 19: Characteristics of included studies with information regarding use of mechanical prophylaxis and type of pharmacological agents**

| Study, Year                         | n    | Population description                                                         | Type of neurosurgery                                      | Pharmacological thromboprophylaxis | Co-interventions                                                                           | Route, doses, and time of pharmacological thromboprophylaxis                                           | Time to follow-up                  | DVT diagnostic technique                                                               | Outcomes assessed                   |
|-------------------------------------|------|--------------------------------------------------------------------------------|-----------------------------------------------------------|------------------------------------|--------------------------------------------------------------------------------------------|--------------------------------------------------------------------------------------------------------|------------------------------------|----------------------------------------------------------------------------------------|-------------------------------------|
| <i>Randomized controlled trials</i> |      |                                                                                |                                                           |                                    |                                                                                            |                                                                                                        |                                    |                                                                                        |                                     |
| Agnelli, 1998(21)                   | 307* | Patients 18 years of age or older                                              | Elective cranial or spinal surgery                        | LMWH (Enoxaparin)                  | Thigh-length TED compression stocking in all patients                                      | Subcutaneous injections, 40 mg per day for 8±1 days                                                    | 60 days                            | Ultrasonography and venography in case of positive ultrasonography.                    | M, PE, proximal DVT, distal DVT, MB |
| Constantini, 2001 (22)              | 103* | Patients over 40 years of age                                                  | Craniotomy for brain tumor removal                        | UFH                                | No reported                                                                                | Subcutaneous injections, 5000 units every 12 hours for 7 days or until full ambulation                 | No reported                        | No reported**                                                                          | M, MB, RO                           |
| Dickinson, 1998 *** (23)            | 66*  | Patients 18 years of age or older with a diagnosis of an intracranial neoplasm | Craniotomy or stereotactic biopsy                         | LMWH (Enoxaparin)                  | Thigh-high TED compression stocking in all patients all patients only before randomization | Subcutaneous injections, 30 mg every 12 hours day until hospital discharge from neurosurgery service   | No reported                        | Duplex ultrasonographic                                                                | M, MB                               |
| Gruber, 1984(24)                    | 50*  | Adult patients undergoing lumbar disc operations                               | Herniated lumbar disc operations                          | Heparin-DHE                        | No reported                                                                                | Subcutaneous injections, 2500 IU-0.5 mg every 12 hours for at least 7 days or until hospital discharge | No reported                        | Phlebogram, plethysmography, Doppler ultrasound or an <sup>125</sup> I fibrinogen test | PE, MB                              |
| Hamidi, 2015(25)                    | 89*  | Patients aged 18 to 75 years                                                   | Elective instrumental spinal surgery                      | LMWH (Enoxaparin)                  | Compression stocking in all patients                                                       | Subcutaneous injections, 40 mg per day within 12 hours before the surgery                              | 2 weeks and 8 months after surgery | Compression doppler ultrasonography                                                    | M, MB, RO                           |
| Nurmohamed, 1996 (12)               | 485* | Patients 18 years of age or older                                              | Craniotomy or spinal column surgery for a tumor or injury | LMWH (Nadroparin calcium)          | TED compression stocking in all patients                                                   | Subcutaneous injections, 7,500 anti-factor Xa per day for 10 days or until hospital discharge          | 56 days after surgery              | B-mode compression ultrasonography and venogram in case of                             | M, proximal DVT, MB                 |

|                                                                                                                                                                                                                                                                                                                                                                                                                                                                                                                                                         |      |                                                                                                    |                                                                                                                                    |                          |                                                                                      |                                                                                                                                                  |                                                   |                                                                           |           |
|---------------------------------------------------------------------------------------------------------------------------------------------------------------------------------------------------------------------------------------------------------------------------------------------------------------------------------------------------------------------------------------------------------------------------------------------------------------------------------------------------------------------------------------------------------|------|----------------------------------------------------------------------------------------------------|------------------------------------------------------------------------------------------------------------------------------------|--------------------------|--------------------------------------------------------------------------------------|--------------------------------------------------------------------------------------------------------------------------------------------------|---------------------------------------------------|---------------------------------------------------------------------------|-----------|
|                                                                                                                                                                                                                                                                                                                                                                                                                                                                                                                                                         |      |                                                                                                    |                                                                                                                                    |                          |                                                                                      |                                                                                                                                                  |                                                   | ultrasonography positive                                                  |           |
| Rokito, 1996 *** (13)                                                                                                                                                                                                                                                                                                                                                                                                                                                                                                                                   | 110* | Patients 18 years of age or older                                                                  | Major reconstructive spinal surgery                                                                                                | Warfarin (Coumadin)      | Thigh-high TED compression stocking in all patients                                  | 10 mg before surgery and doses were adjusted accordingly to prothrombin time                                                                     | 1 year                                            | Duplex ultrasonography and venography in case of ultrasonography positive | PE, MB    |
| <b>Non-randomized studies</b>                                                                                                                                                                                                                                                                                                                                                                                                                                                                                                                           |      |                                                                                                    |                                                                                                                                    |                          |                                                                                      |                                                                                                                                                  |                                                   |                                                                           |           |
| Bauman, 2009 (26)                                                                                                                                                                                                                                                                                                                                                                                                                                                                                                                                       | 254  | Patients with movement disorders (Parkinson disease, essential tremor, dystonia)                   | Deep brain stimulation (DBS) surgery                                                                                               | UFH                      | Compression stocking in all patients and pneumatic compression boots postoperatively | Subcutaneous injections, 50 mg before surgery and 50 mg every 12 hours after surgery. Duration of pharmacological thromboprophylaxis no reported | No reported                                       | Doppler ultrasonography                                                   | M, PE, MB |
| Dermody, 2011 (16)                                                                                                                                                                                                                                                                                                                                                                                                                                                                                                                                      | 174  | Neurosurgical patients who underwent screening with weekly VDUS of the bilateral lower extremities | Endovascular coiling or clipping, craniotomy, stereotactic biopsy, spine surgery, trans sphenoidal surgery                         | UFH or LMWH (Enoxaparin) | Mechanical prophylaxis                                                               | UFH: 5000 two or three times daily<br>Enoxaparin: no reported                                                                                    | 6 months                                          | Venous duplex ultrasound                                                  | MB        |
| Hacker, 2012(27)                                                                                                                                                                                                                                                                                                                                                                                                                                                                                                                                        | 522  | Neurosurgical and head trauma patients                                                             | Cervical spinal cord decompression, cervical laminectomy, craniotomy/craniectomy, decompressive laminectomy, nasal sinuses surgery | UFH                      | Lower extremity compression boots                                                    | Subcutaneous injections, 5000 IU every 8 hours until hospital discharge                                                                          | Until death or until discharged from the hospital | Ultrasound evaluation                                                     | M, PE, MB |
| <p>* Number of patients randomized<br/> ** Authors reported DVT only by clinical evidence<br/> *** Three-arm RCT<br/> † Reported as proximal or distal DVT<br/> ‡ Findings were reported qualitatively<br/> ASCI: acute spinal cord injury; DHE: dihydroergotamine; DVT: deep venous thrombosis; LMWH: low molecular weight heparin; M: mortality; MB: major bleeding; PE: pulmonary embolism; RO: reoperation; SCD: sequential compression device; TED: thrombosis embolic deterrent; UFH: unfractionated heparin; VDUS: venous duplex ultrasound.</p> |      |                                                                                                    |                                                                                                                                    |                          |                                                                                      |                                                                                                                                                  |                                                   |                                                                           |           |
