# Supplementary material
Source: PubMed Central journal article supplement (PMC6963238)

**Supplement 4: Modeling of clinically important symptomatic events**

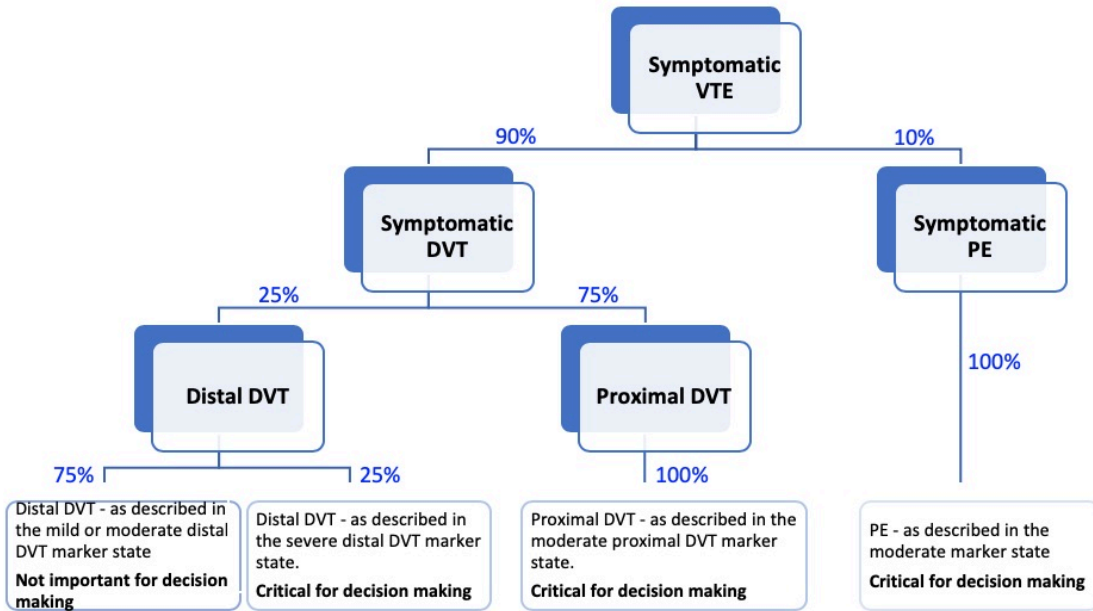

Supplement: baADV2019000975-suppl3.pdf [file baADV2019000975-suppl3.pdf]
